# Supplementary material for: Full-length single-cell RNA-seq applied to a viral human cancer: applications to HPV expression and splicing analysis in HeLa S3 cells
Source: PubMed Central journal article supplement (PMC4635585; doi:10.1186/s13742-015-0091-4), 2015-11-05
Supplement: 13742_2015_91_MOESM1_ESM.pdf [file 13742_2015_91_MOESM1_ESM.pdf]

# Full-length single-cell RNA-seq applied to a viral human cancer: Applications to HPV expression and splicing analysis in HeLa S3 cells

Liang Wu<sup>†1</sup>, Xiaolong Zhang<sup>†1,2</sup>, Zhikun Zhao<sup>†1,3,4</sup>, Ling Wang<sup>†5</sup>, Bo Li<sup>1</sup>, Weijian Rao<sup>1</sup>, Guibo Li<sup>1</sup>, Michael Dean<sup>6</sup>, Yanhui Wang<sup>1</sup>, Qichao Yu<sup>7</sup>, Xinxin Lin<sup>1</sup>, Zhanlong Mei<sup>1</sup>, Yang Li<sup>1</sup>, Runze Jiang<sup>1</sup>, Huan Yang<sup>1</sup>, Fuqiang Li<sup>1</sup>, Guoyun Xie<sup>1</sup>, Liqin Xu<sup>1</sup>, Kui Wu<sup>1</sup>, Jie Zhang<sup>1</sup>, Jing Wei<sup>1</sup>, Jianghao Chen<sup>5</sup>, Ting Wang<sup>5</sup>, Karsten Kristiansen<sup>8</sup>, Xiuqing Zhang<sup>9</sup>, Yingrui Li<sup>1,10</sup>, Huanming Yang<sup>1,11</sup>, Jian Wang<sup>1,11</sup>, Yong Hou<sup>\*1,8</sup>, Xun Xu<sup>1</sup>

## Supplementary Information

|                                |                                                                                                                                                                                           |
|--------------------------------|-------------------------------------------------------------------------------------------------------------------------------------------------------------------------------------------|
| <b>Supplementary Figure 1</b>  | The flowchart of sample preparation and analysis                                                                                                                                          |
| <b>Supplementary Figure 2</b>  | The distribution of cells in wells for different cell concentrations                                                                                                                      |
| <b>Supplementary Figure 3</b>  | The melting temperature (T <sub>m</sub> ) and cycle threshold (C <sub>t</sub> ) of different samples including 1 pg, 10 pg, 40 pg, 160 pg RNA after SYBR Green I based cDNA amplification |
| <b>Supplementary Figure 4</b>  | Typical Agilent 2100 bioanalyzer detection results of the products identified by T <sub>m</sub> and C <sub>t</sub> values extracted from micro-wells                                      |
| <b>Supplementary Figure 5</b>  | The overlap of genes detected in each single cells and in bulk RNA                                                                                                                        |
| <b>Supplementary Figure 6</b>  | The overlap of genes detected in combined single cells and bulk RNA                                                                                                                       |
| <b>Supplementary Figure 7</b>  | The fraction of genes detected at different expression levels                                                                                                                             |
| <b>Supplementary Figure 8</b>  | Gene detected numbers along expression level with different sequencing depths.                                                                                                            |
| <b>Supplementary Figure 9</b>  | Saturation curves of gene detection number by different sequencing depths (FPKM > 1)                                                                                                      |
| <b>Supplementary Figure 10</b> | Strand bias of the RNA libraries                                                                                                                                                          |
| <b>Supplementary Figure 11</b> | The gene distribution by different length of transcripts and GC content                                                                                                                   |
| <b>Supplementary Figure 12</b> | The correlation coefficients of pair-wise ERCC spike-ins in different wells                                                                                                               |
| <b>Supplementary Figure 13</b> | The correlation coefficient of pair-wise 10 pg RNA replicates                                                                                                                             |
| <b>Supplementary Figure 14</b> | The linear regression relationship between FPKM and real mRNA copy number of spike-ins of one randomly selected single cell                                                               |
| <b>Supplementary Figure 15</b> | Distribution of gene expression levels in estimated copies per cell in single cells and 10 pg RNA replicates                                                                              |
| <b>Supplementary Figure 16</b> | The variable sizes of HeLa S3 cells observed by microscope                                                                                                                                |
| <b>Supplementary Figure 17</b> | Cell clustering according to phase-specific expressed genes.                                                                                                                              |
| <b>Supplementary Figure 18</b> | Cell cycle analysis by flow cytometry                                                                                                                                                     |
| <b>Supplementary Figure 19</b> | Alternative splicing isoform distribution in single cells and reads                                                                                                                       |

|                                |                                                                                                           |
|--------------------------------|-----------------------------------------------------------------------------------------------------------|
|                                | mapping of gene <i>AXAN2</i> and <i>YWHAZ</i>                                                             |
| <b>Supplementary Figure 20</b> | The number of detected novel splices in single cells                                                      |
| <b>Supplementary Figure 21</b> | The frequency of detected gene fusions in single cells                                                    |
| <b>Supplementary Figure 22</b> | Splicing donor-accepter signals detected at the HPV-18/cellular fusion breakpoints                        |
| <b>Supplementary Figure 23</b> | Quantification of HPV/human fusions                                                                       |
| <b>Supplementary Figure 24</b> | Clustering of correlation coefficients of genes in the module which contains <i>E6</i> and <i>E7</i> .    |
| <b>Supplementary Figure 25</b> | Cells dispensed on a plastic film under the microscope                                                    |
| <b>Supplementary Table 1</b>   | Information of the sample-preparation platform and object (single cell or total RNA) of each library used |
| <b>Supplementary Table 2</b>   | Information of RNA-seq data                                                                               |
| <b>Supplementary Table 3</b>   | Cell settling rate in Percoll solution of different concentrations                                        |
| <b>Supplementary Table 4</b>   | The Ct and Tm values of samples used to validate the selection mechanism                                  |
| <b>Supplementary Table 5</b>   | The Reactome results of variably expressed genes and stably expressed genes                               |
| <b>Supplementary Table 6</b>   | Differential expressed genes between the G2(M) and non-G2(M) group of cells                               |
| <b>Supplementary Table 7</b>   | The Reactome results of defined co-expression modules                                                     |
| <b>Supplementary Table 8</b>   | Detailed information on fusion sites detected from RNA data                                               |
| <b>Supplementary Table 9</b>   | Detailed information of HPV-human fusion sites detected from RNA data                                     |
| <b>Supplementary Table 10</b>  | Reads support by HeLa S3 cell line genome sequencing                                                      |
| <b>Supplementary Table 11</b>  | The reads number and ratio of different types of 233bp and 929bp in HPV genome                            |
| <b>Supplementary Table 12</b>  | Genes clustered with the <i>E6</i> and <i>E7</i> in co-expression analysis                                |
| <b>Supplementary Table 13</b>  | The comparison between MIRALCS and Fluidigm C1 system.                                                    |
| <b>Supplementary Table 14</b>  | The components of lysis buffer                                                                            |
| <b>Supplementary Table 15</b>  | The components of reverse transcription reaction buffer                                                   |
| <b>Supplementary Table 16</b>  | The components of cDNA amplification reaction buffer                                                      |
| <b>Supplementary Note 1</b>    | Operation steps of MIRALCS                                                                                |

## Supplementary information

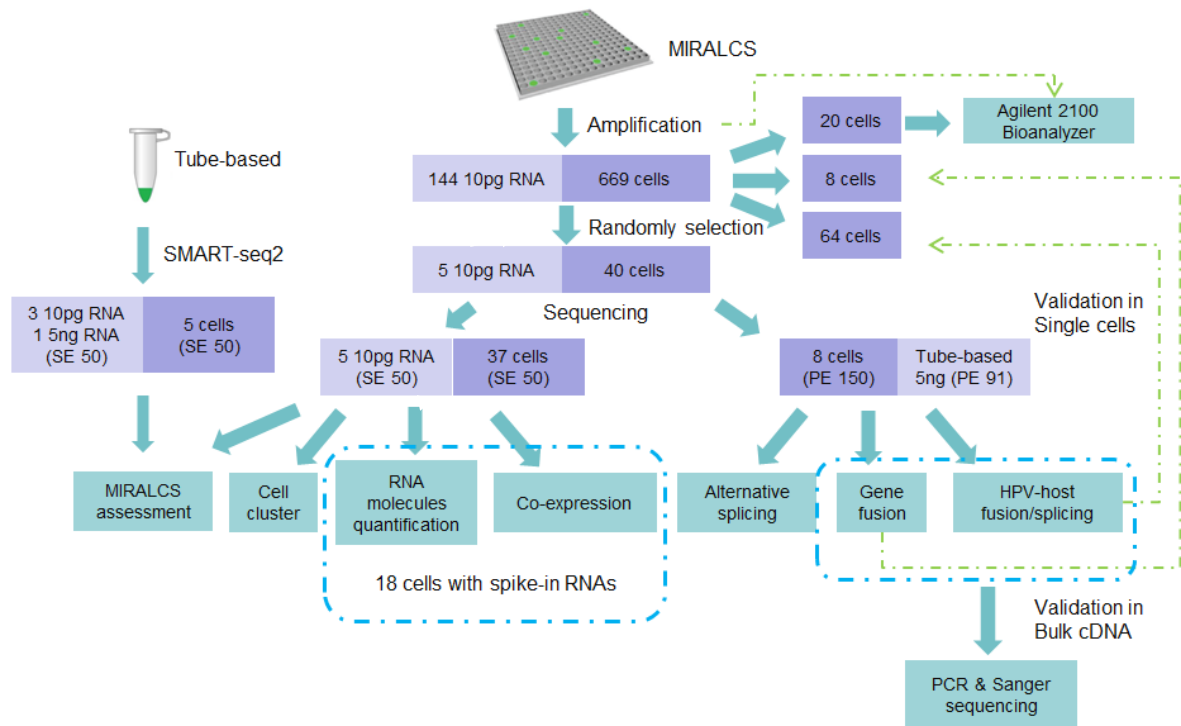

**Supplementary Figure 1.** The flowchart of sample preparation and analysis.

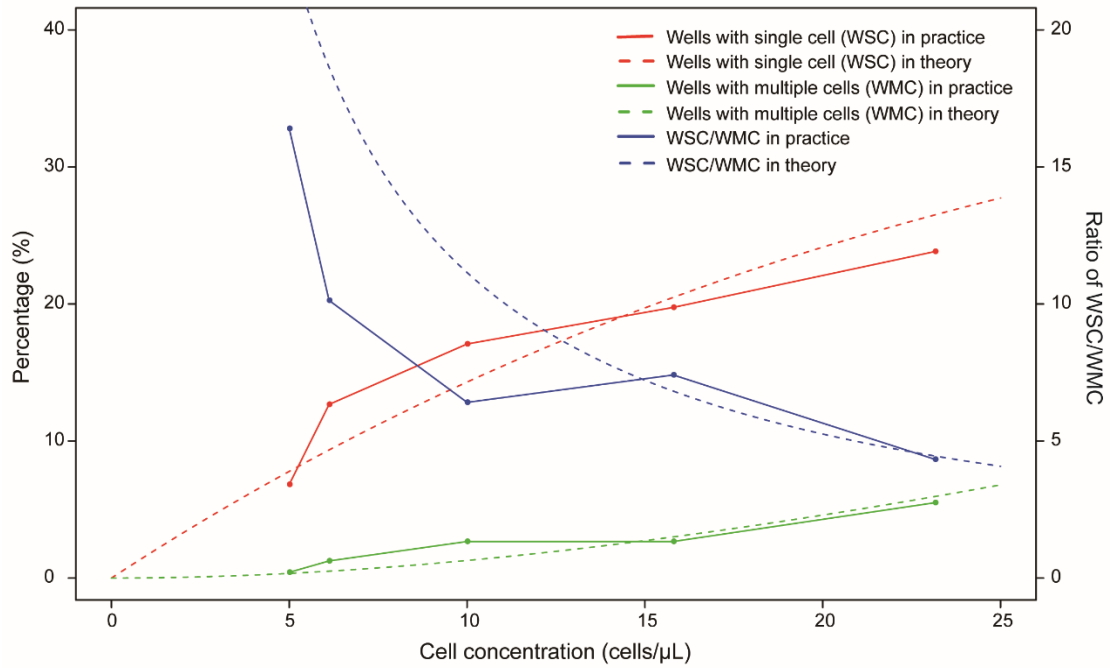

**Supplementary Figure 2.** The distribution of cells in wells for different cell concentrations. Red lines indicate the percentage of wells with single cells; green lines the percentage of wells with multiple cells; blue lines represent the ratio of wells with single cells to that of multiple cells. The solid line is the experiment result, while the dotted line is the theoretical result. The theoretical result follows the Poisson equation with modification of  $\lambda$  to  $\sim\lambda/2.951$ .

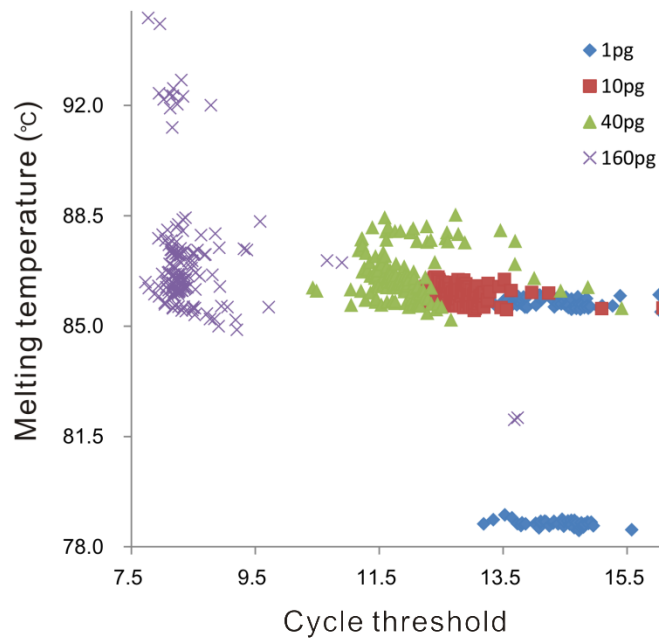

**Supplementary Figure 3.** The melting temperature (T<sub>m</sub>) and cycle threshold (C<sub>t</sub>) of different samples including 1 pg, 10 pg, 40 pg and 160 pg RNA after SYBR Green I based cDNA amplification.

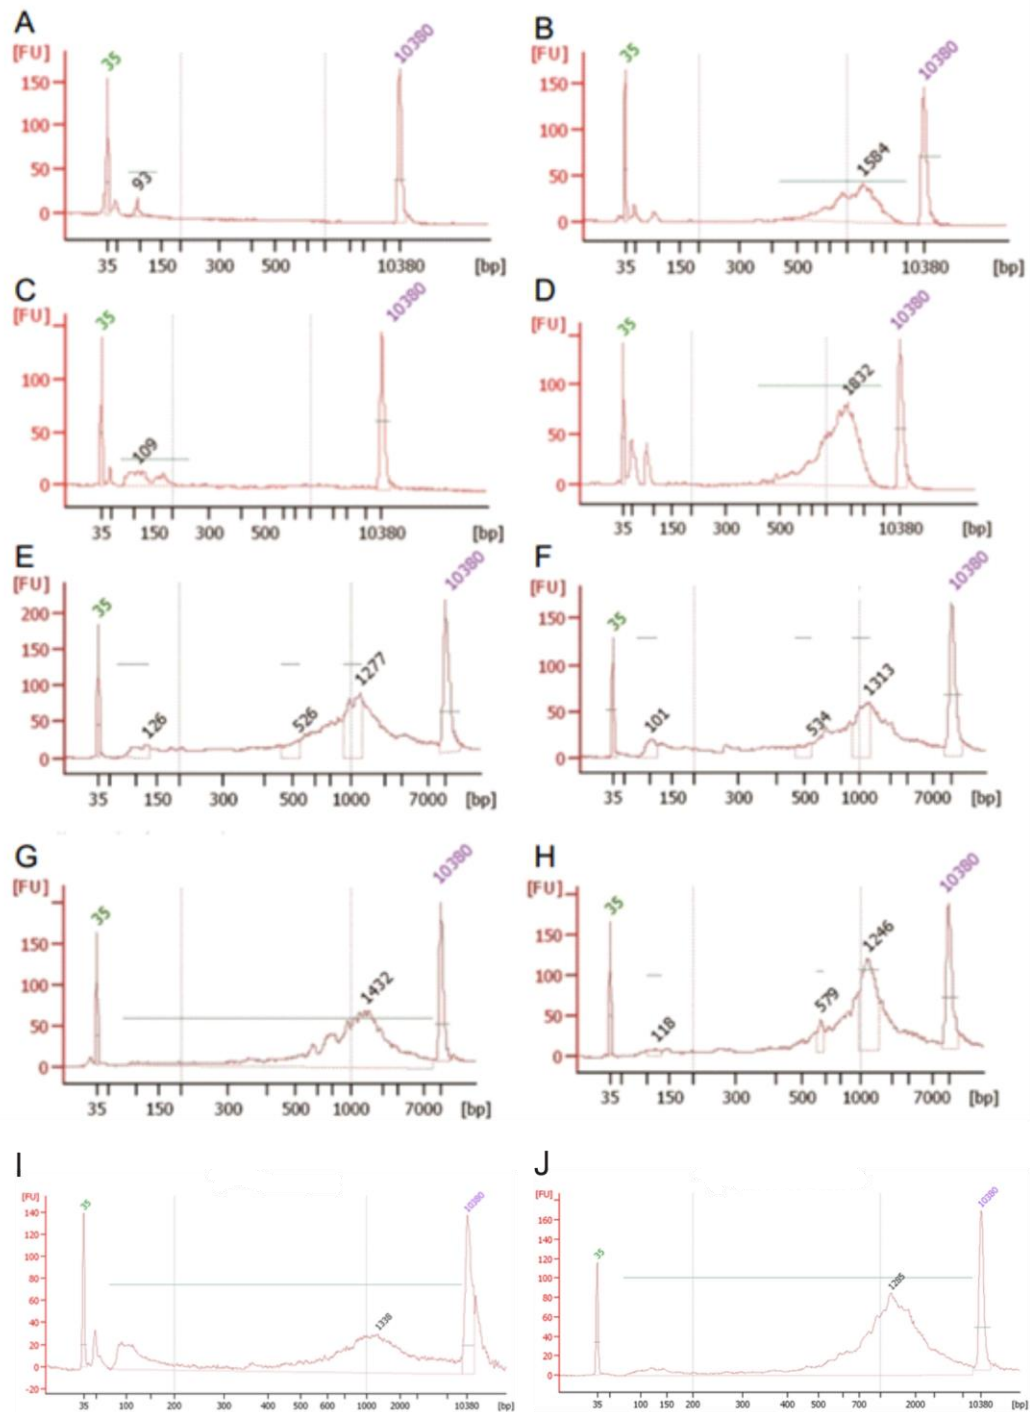

**Supplementary Figure 4.** Typical Agilent 2100 bioanalyzer detection results of the products identified by Tm and Ct values extracted from micro-wells. (A) Negative control of 20% Percoll solution without cells; (B) Positive control of total RNA extracted from HeLa S3 cells with a concentration of ~10 pg/well; (C) Expected non-target well without HeLa S3 cell; (D) Expected target well with HeLa S3 cell; (E) Expected target well of a fresh urinary bladder cancer tissue cells; (F) Expected target well of fresh human bladder cells; (G) Expected target well with a CLL cell identified; (H) Expected target well of a frozen mouse urinary cell identified; (I) Expected target well of frozen human bladder cell; (J) Expected target well of frozen mouse liver cell.

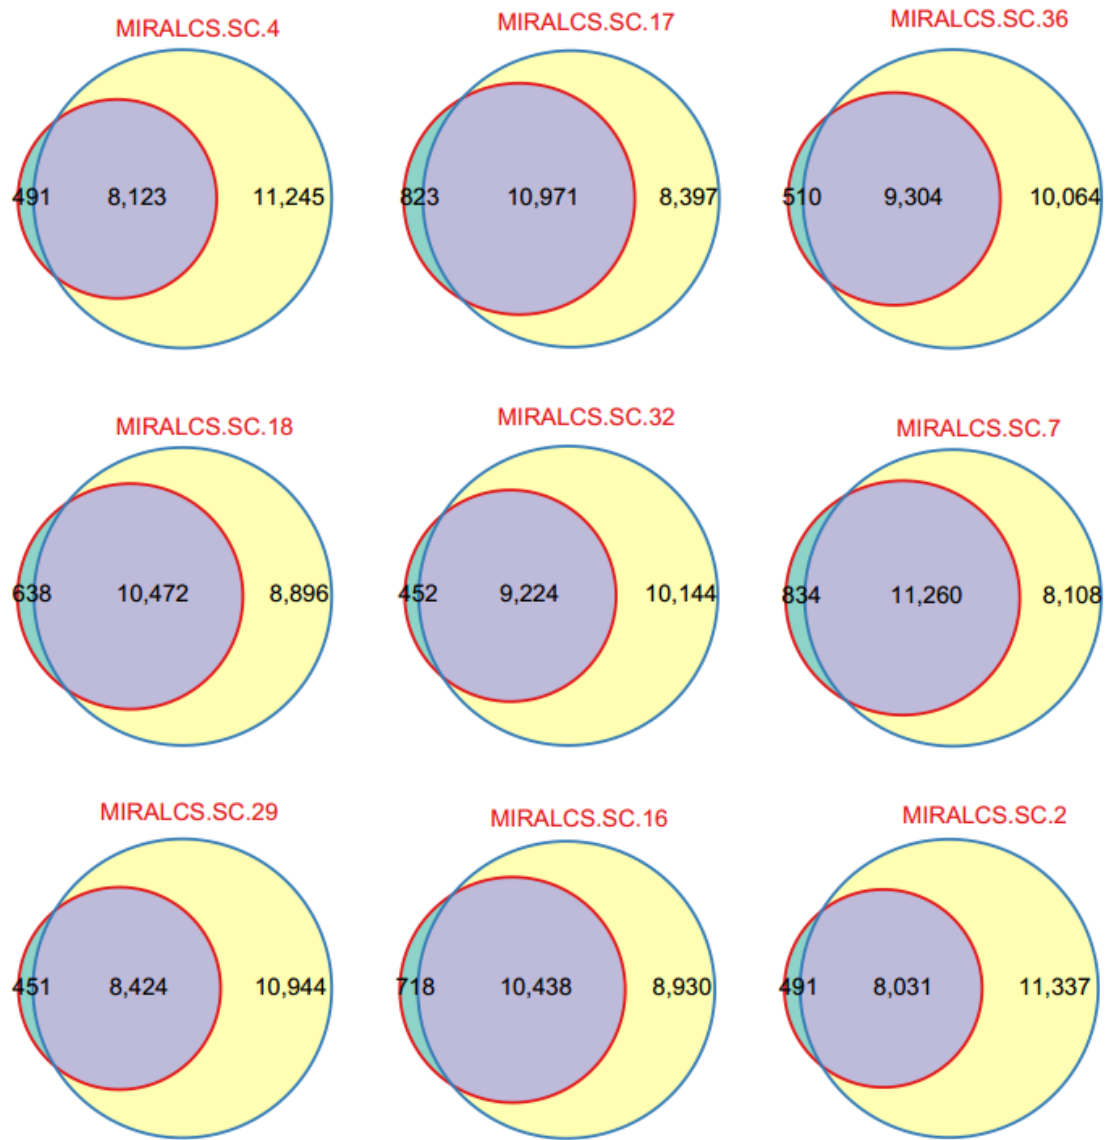

**Supplementary Figure 5.** The overlap of genes detected in each single cells and in bulk RNA. In total 9/37 randomly selected Venn diagram comparisons are shown. The smaller circles represent single cells, and the larger ones represent bulk RNA.

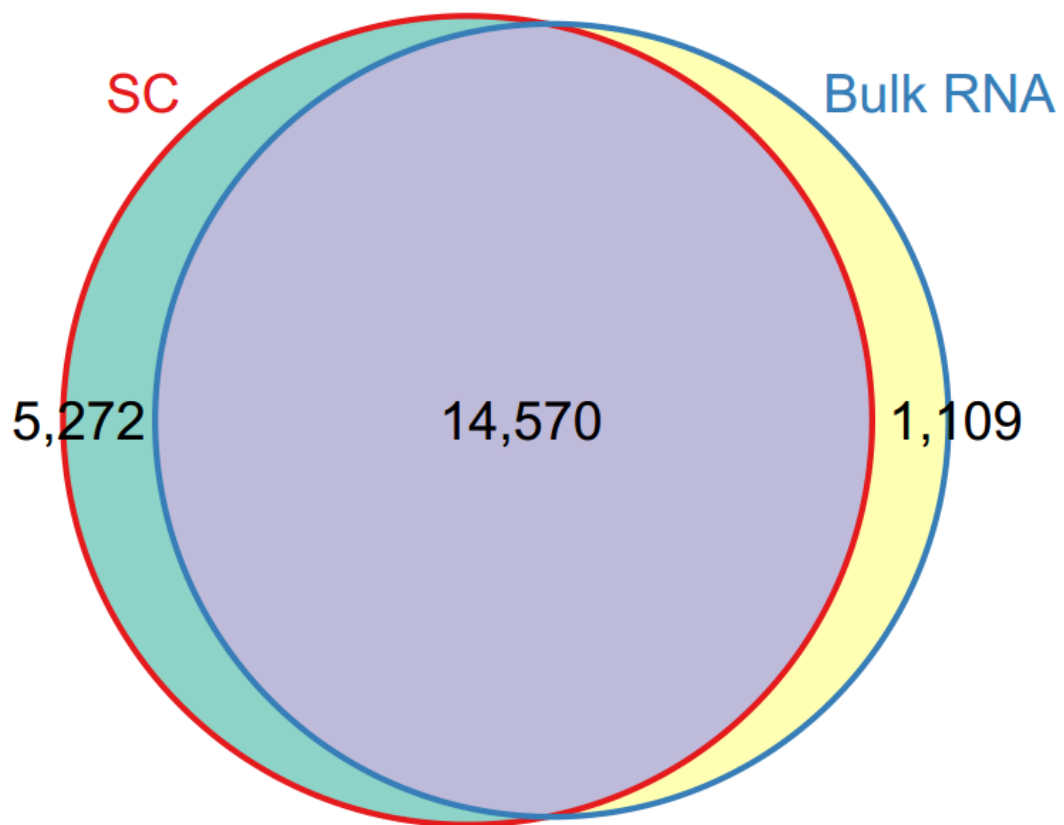

**Supplementary Figure 6.** The overlap of genes detected in combined single cells and bulk RNA. The circle with the red line represents the genes detected in any of 37 single cells, and the blue one represents genes detected in bulk RNA.



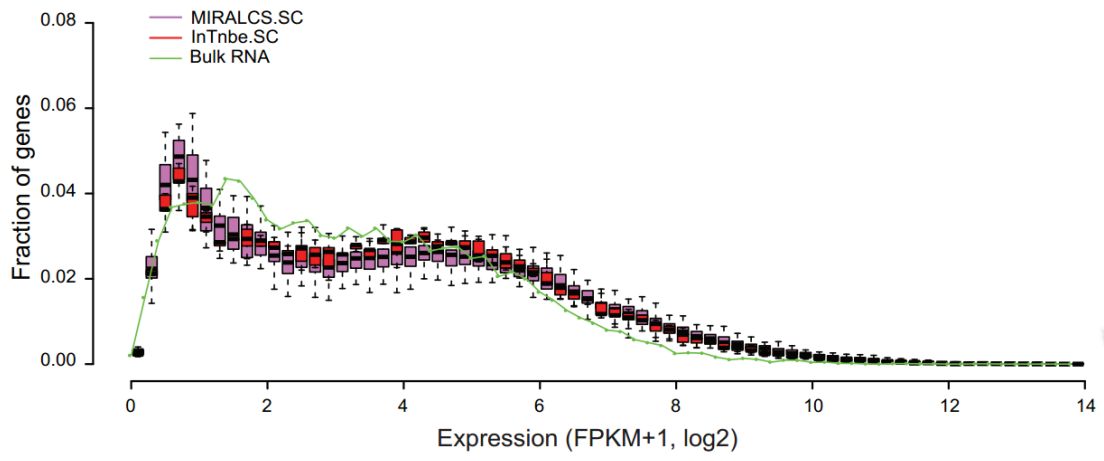

**Supplementary Figure 7.** The fraction of genes detected at different expression levels.

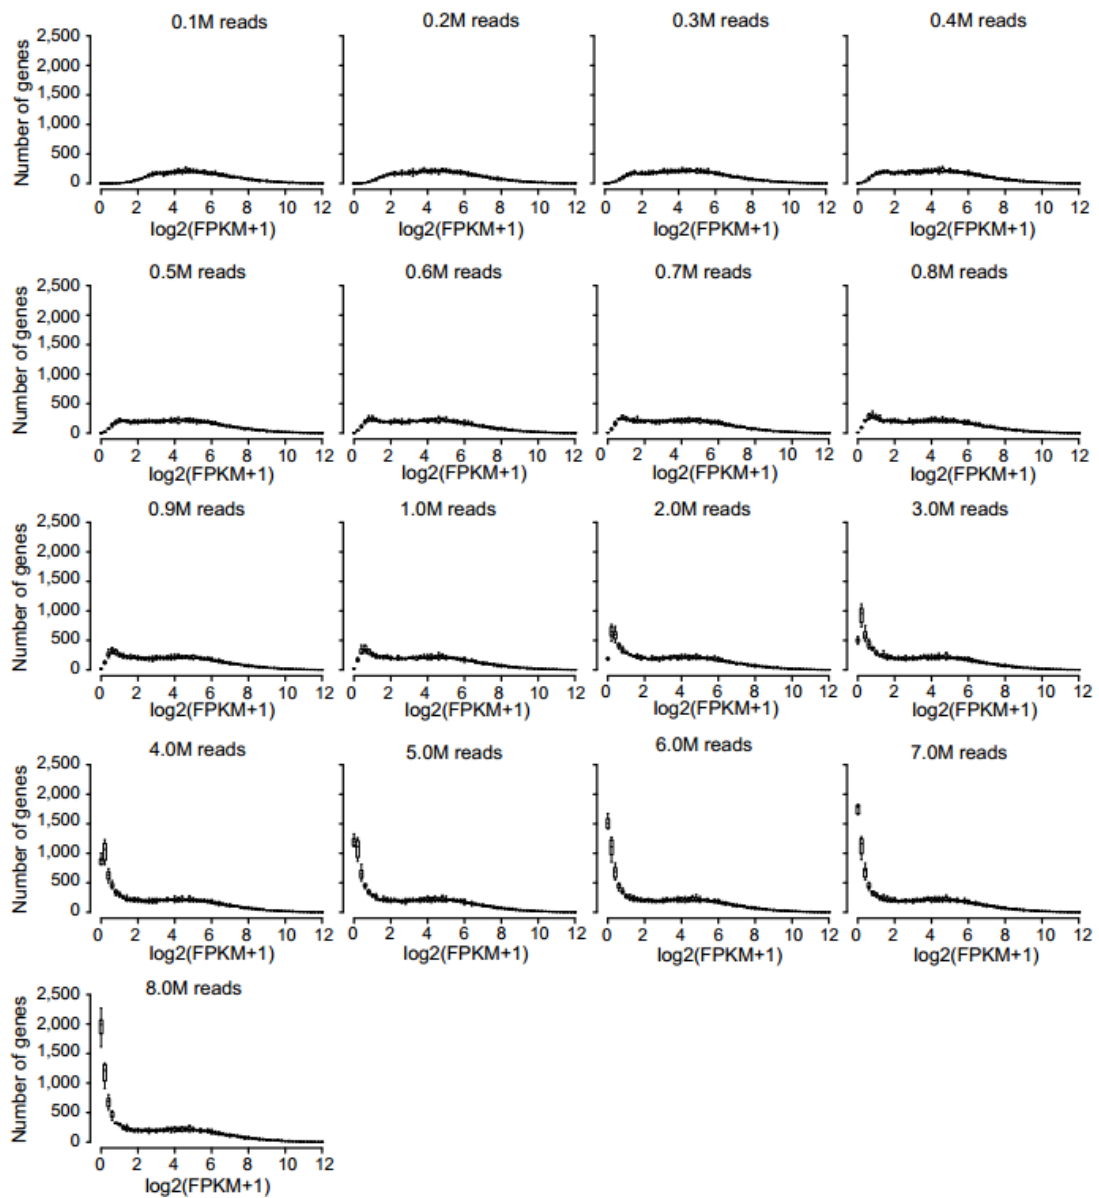

**Supplementary Figure 8.** Gene detected numbers along expression level with different sequencing depths. Each figure was generated from randomly downsampled unique mapping reads from the same group of single cell libraries.

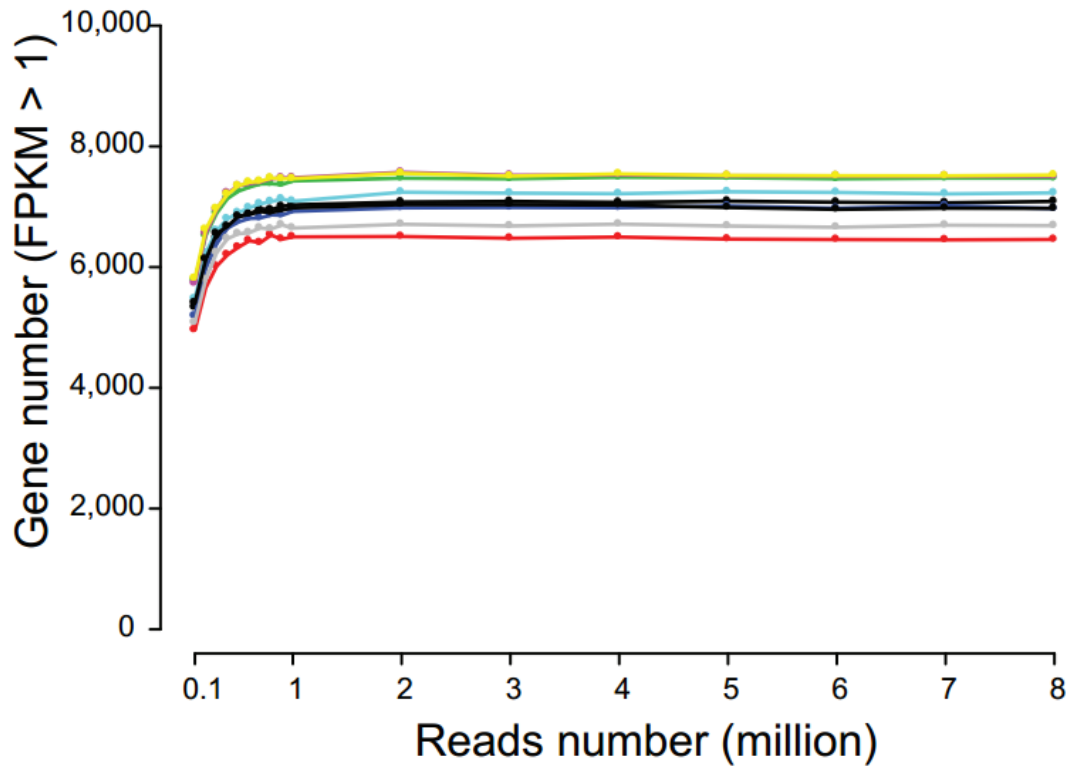

**Supplementary Figure 9.** Saturation curves of gene detection number for different sequencing depths (FPKM > 1). Unique mapping reads of different cells have been randomly downsampled to different depths (0.1-0.9 million, 1 million - 8 million), respectively. Only genes with FPKM greater than 1 are selected for the curves. Each line represents a single cell.

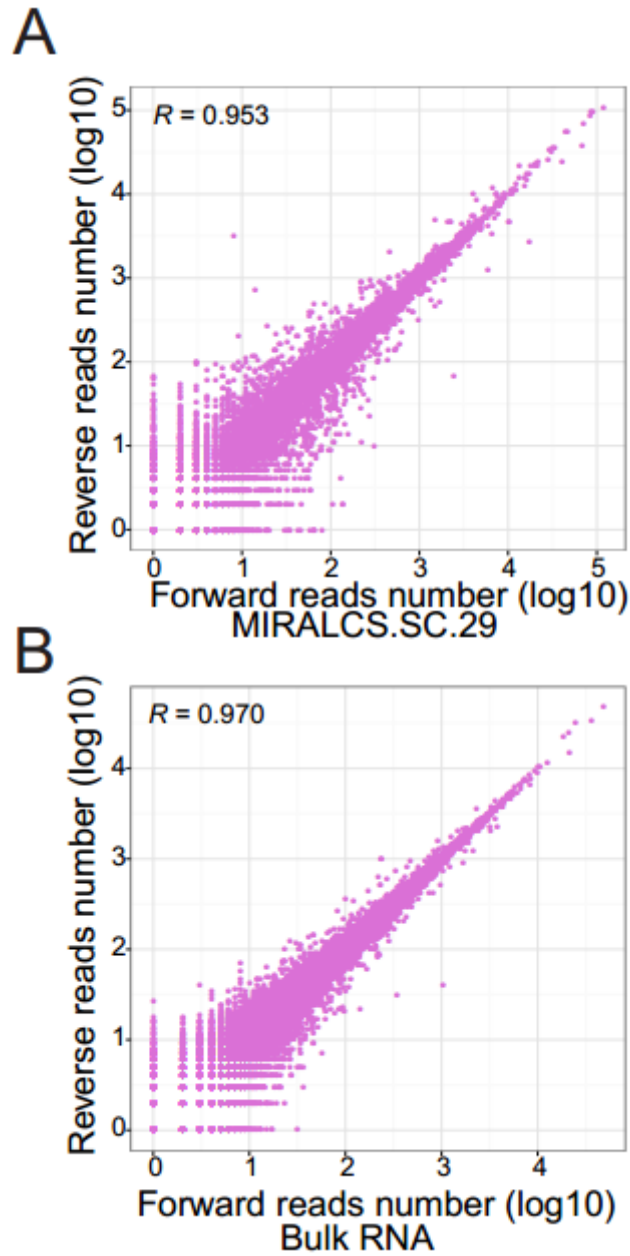

**Supplementary Figure 10.** Strand bias of the RNA libraries. (A) Strand bias of the single cell libraries. (B) Strand bias of the bulk RNA library. The x coordinate and y coordinate indicate the number of forward reads and reverse reads which were mapped to each gene.

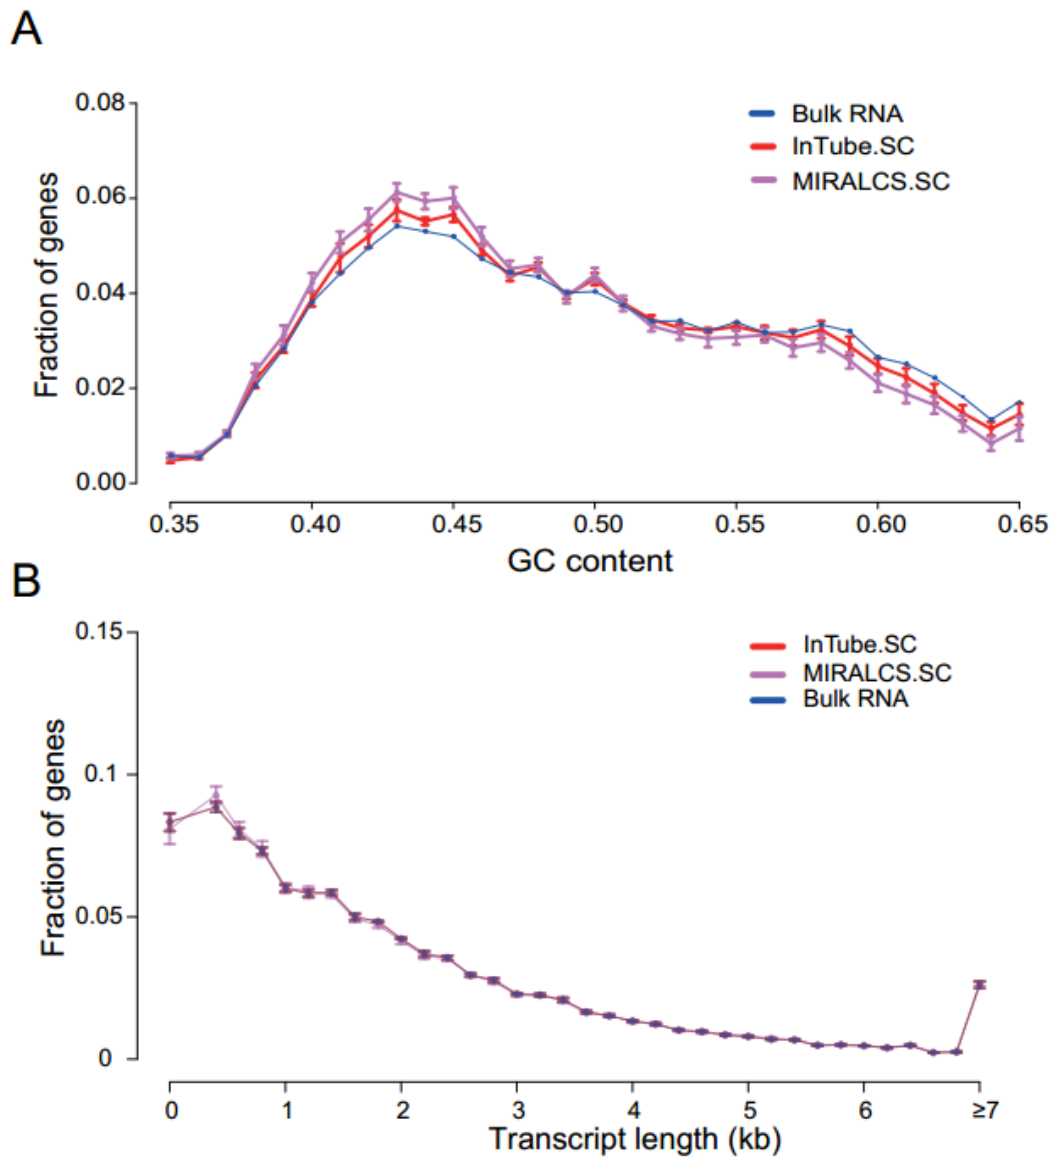

**Supplementary Figure 11.** The gene distribution by different length of transcripts and GC content. (A) Fraction of genes detected for different transcript lengths. (B) Fraction of genes detected for different CG content.

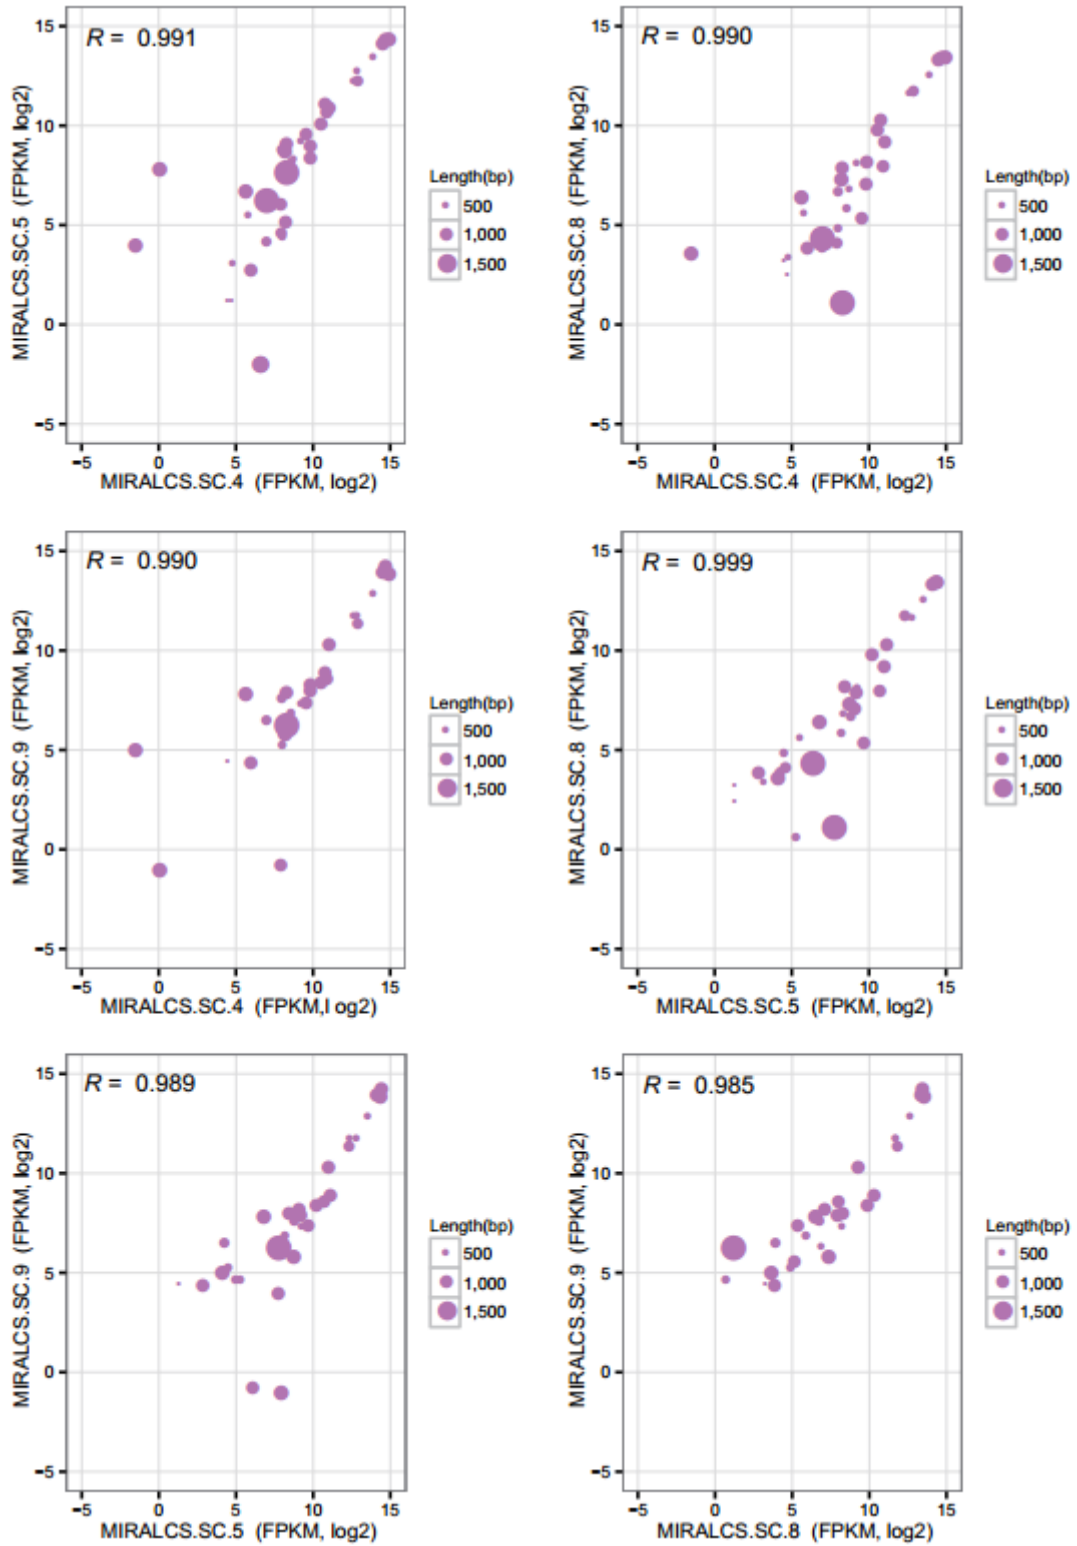

**Supplementary Figure 12.** The correlation coefficients of pair-wise ERCC spike-ins in different wells. Six results of them are randomly selected.

**A**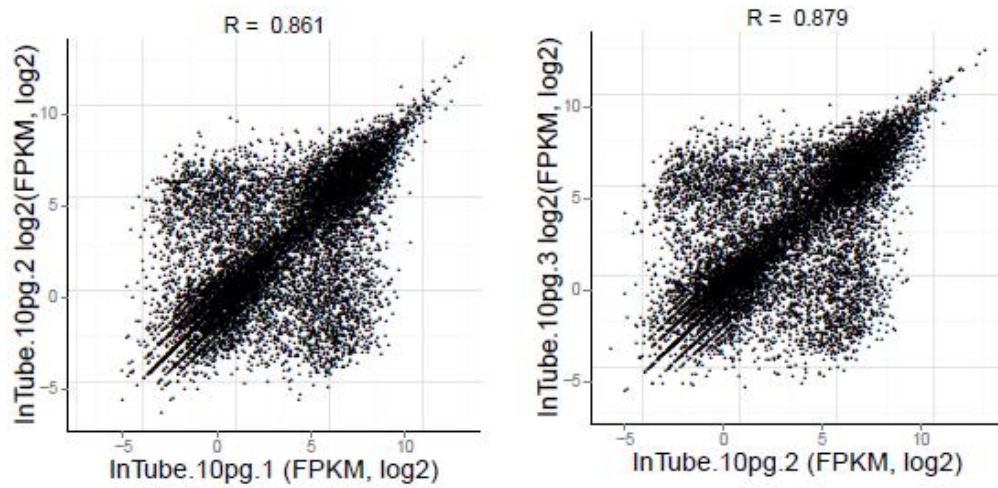**B**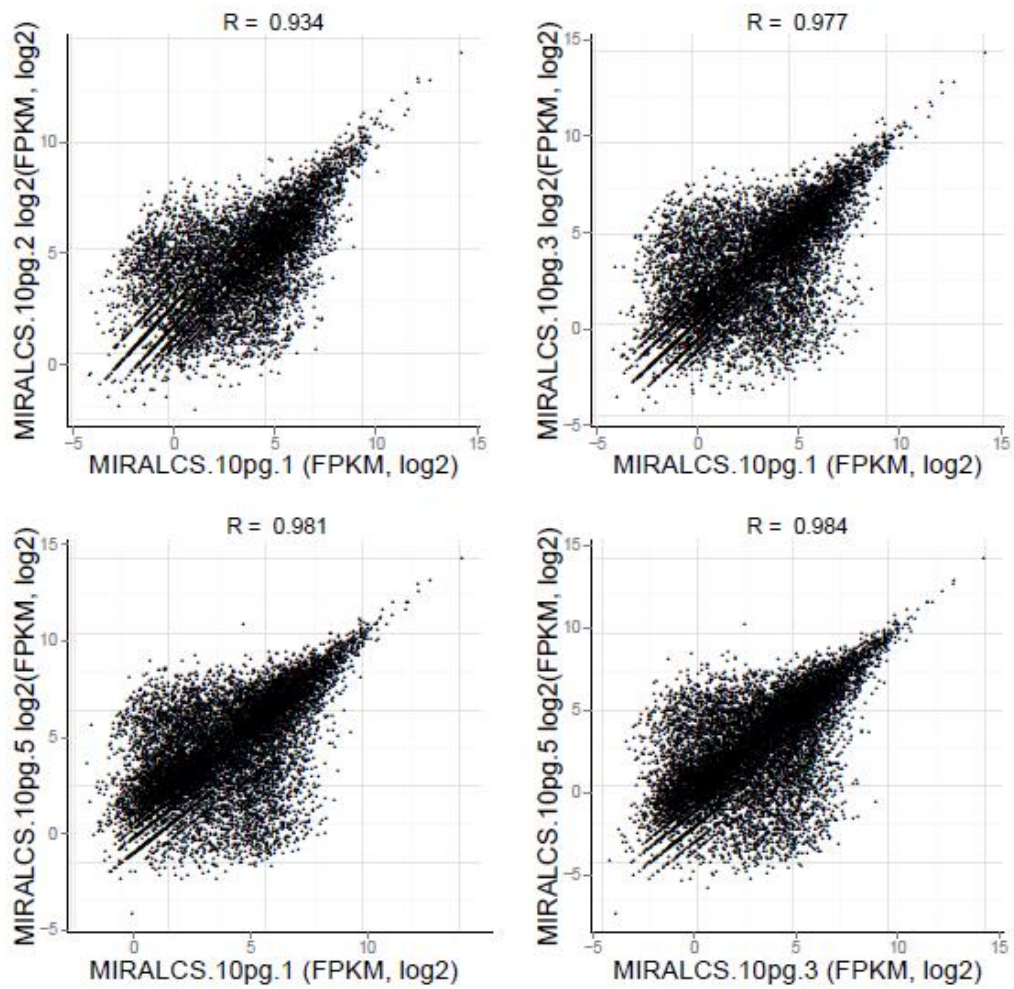

**Supplementary Figure 13.** The correlation coefficient of pair-wise 10 pg RNA replicates. (A) The pair-wise correlation of tube-based 10pg RNA libraries. (B) The pair-wise correlation of MIRALCS 10pg RNA libraries.

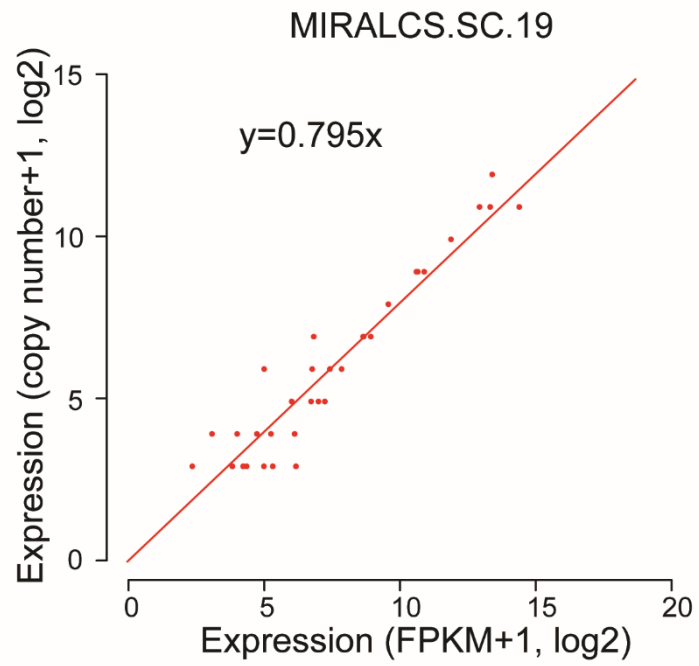

**Supplementary Figure 14.** The linear regression relationship between FPKM and real mRNA copy number of spike-ins of one randomly selected single cell.



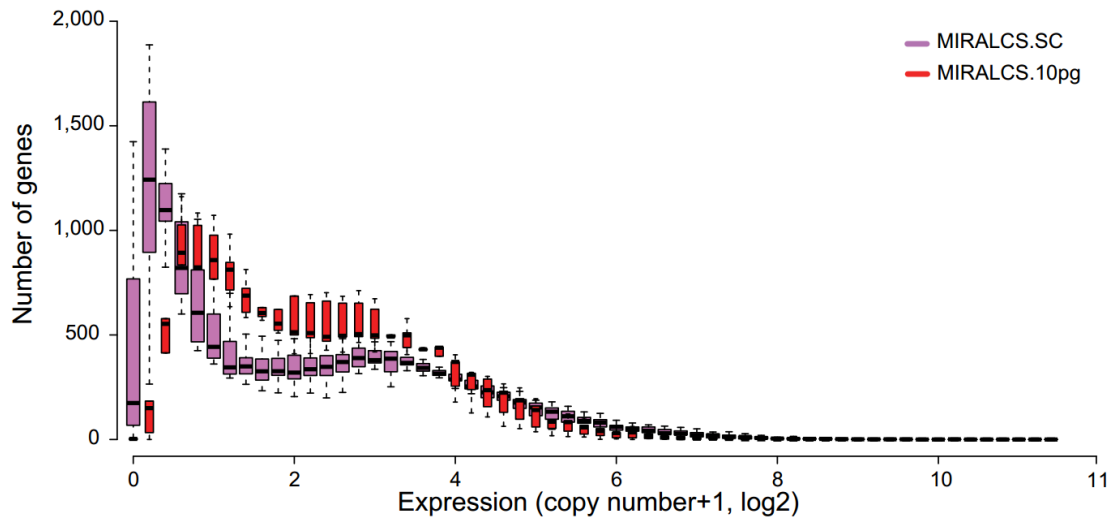

**Supplementary Figure 15.** Distribution of gene expression levels in estimated copies per cell in single cells and 10 pg RNA replicates.

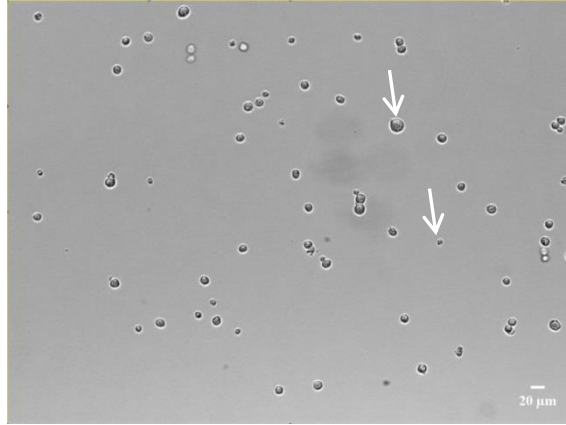

**Supplementary Figure 16.** The variable sizes of HeLa S3 cells observed by microscope. The white arrows point to typical cells with variable sizes. Scale bar stands for 20  $\mu\text{m}$ .

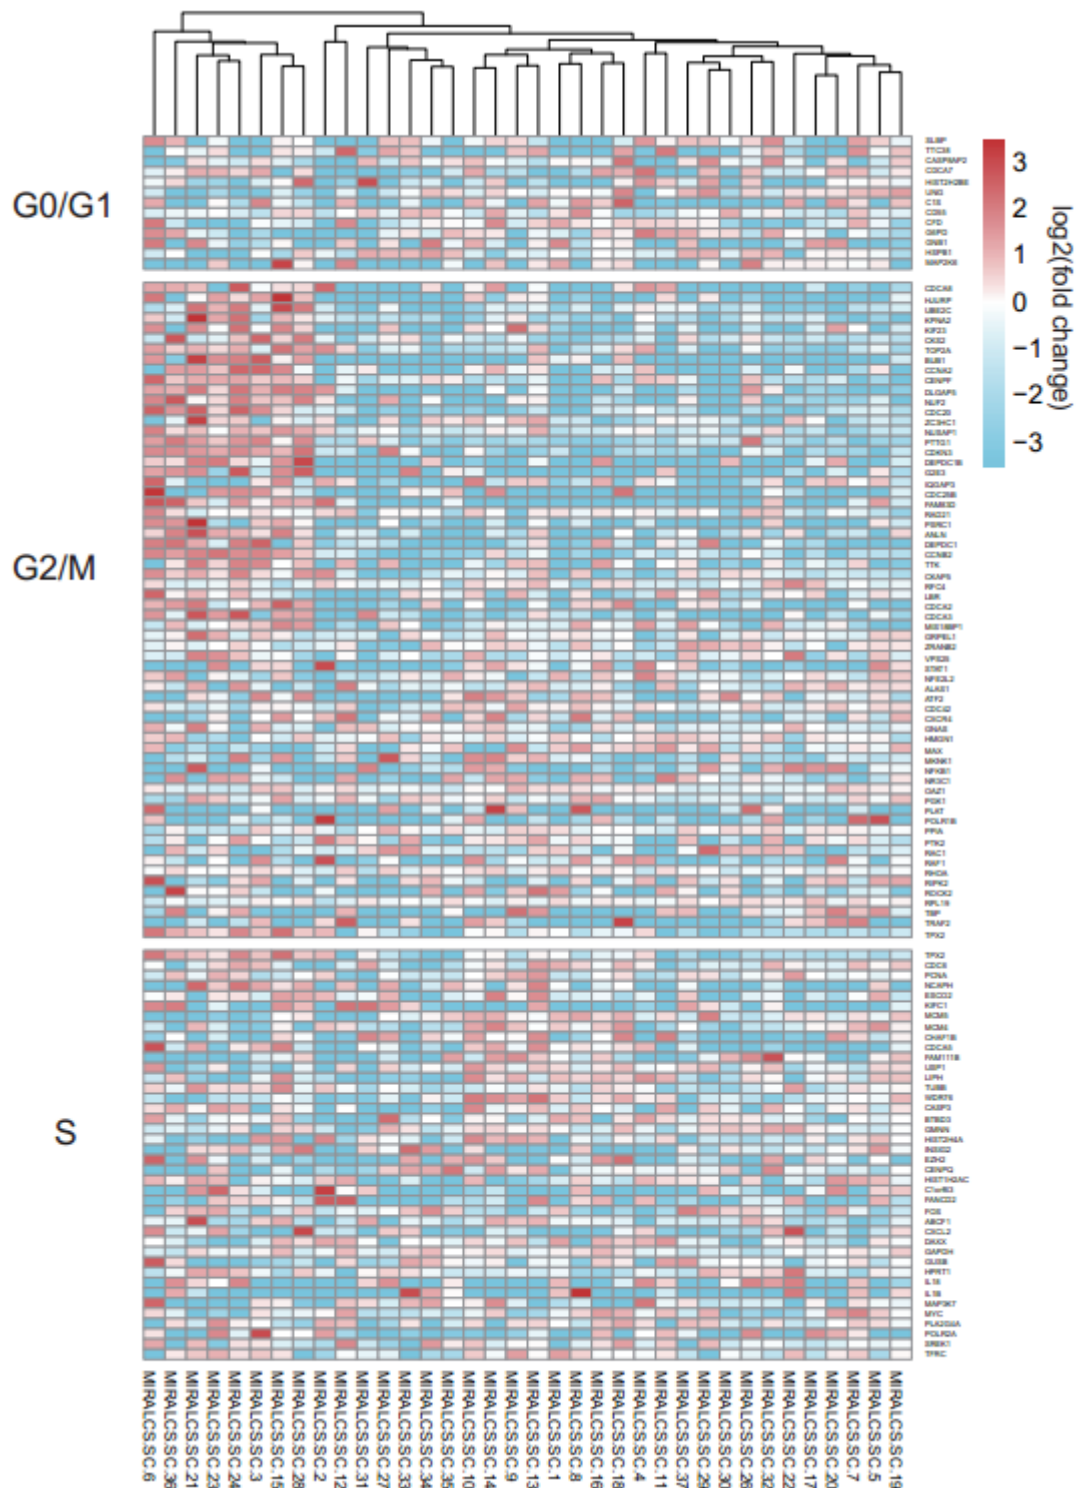

**Supplementary Figure 17.** Cell clustering according to phase-specific expressed genes. There are 8 cells displaying a higher expression level in G2/M relative genes.

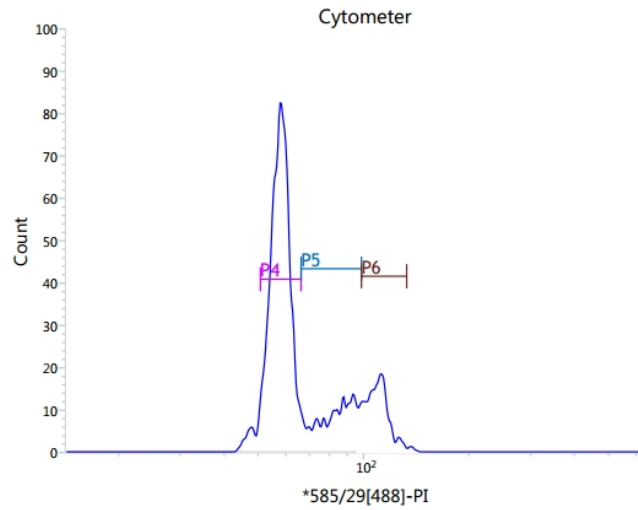

| Populations: Cytometer |         |         |          |
|------------------------|---------|---------|----------|
| Populations            | Even... | % Total | % Parent |
| All Events             | 11,786  | 100.00% | ####     |
| P1                     | 4,270   | 36.23%  | 36.23%   |
| P2                     | 3,660   | 31.05%  | 85.71%   |
| P3                     | 2,593   | 22.00%  | 70.85%   |
| P4                     | 1,678   | 14.24%  | 64.71%   |
| P5                     | 520     | 4.41%   | 20.05%   |
| P6                     | 431     | 3.66%   | 16.62%   |

**Supplementary Figure 18.** Cell cycle analysis by flow cytometry. The percentage of G2/M phase (P6) is 16.6%.

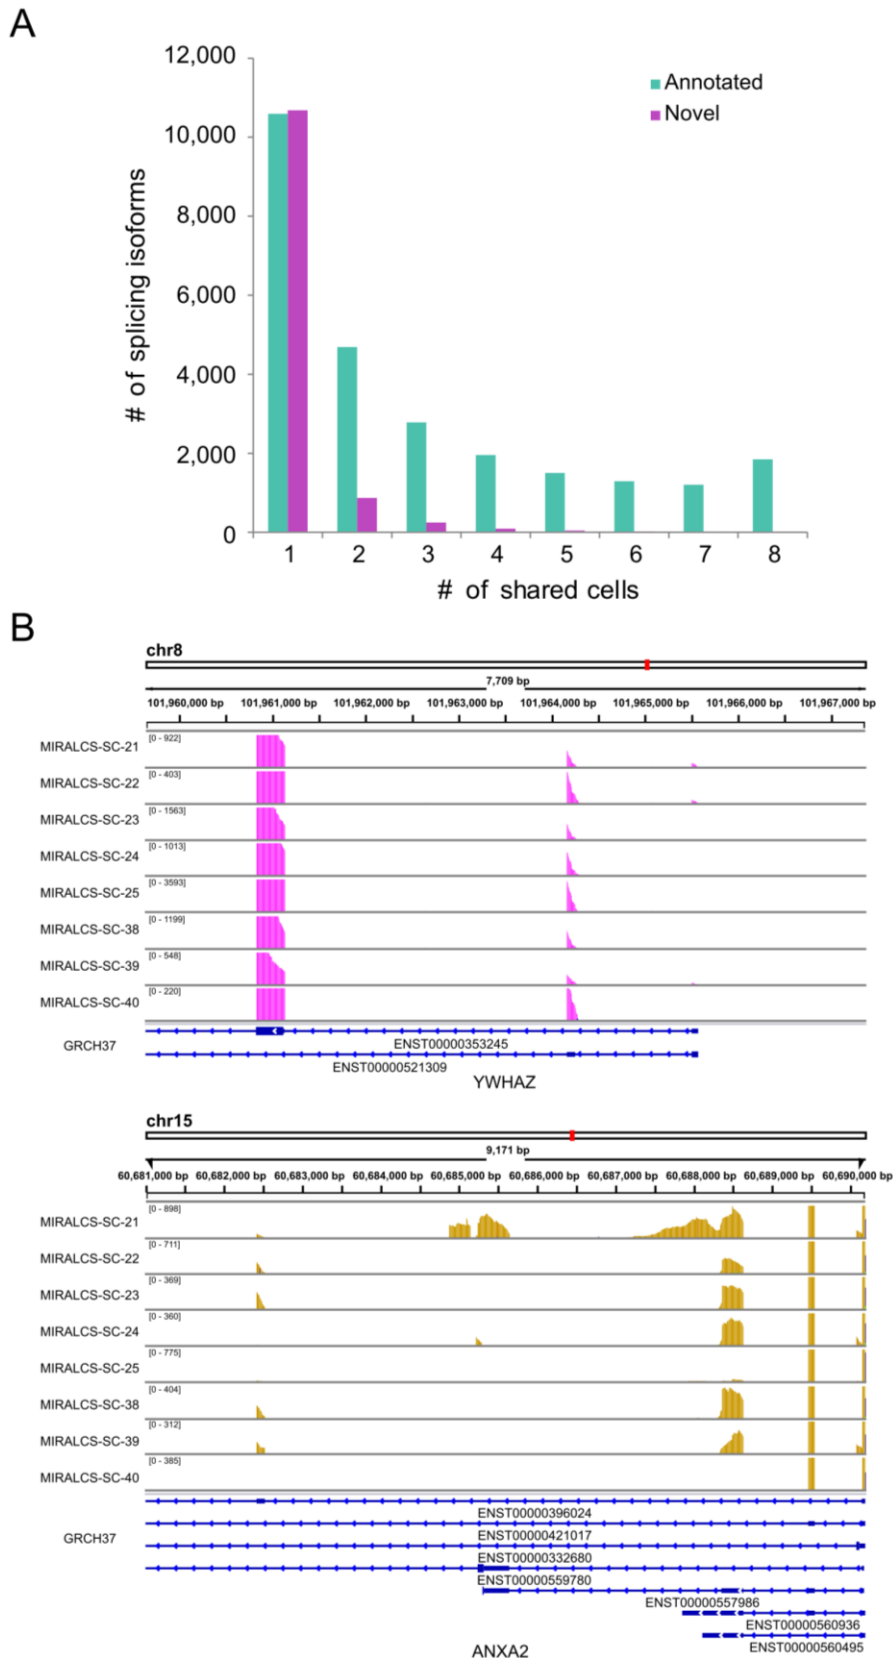

**Supplementary Figure 19.** Alternative splicing isoform distribution in single cells and reads mapping of gene *AXAN2* and *YWHAZ*. (A) Alternative splicing isoform distribution in single cells. The green bars stand for the number of annotated splicing

isoforms, and the purple bars for the number of novel splicing isoforms. (B) Reads mapping of gene *AXAN2* and *YWHAZ*.

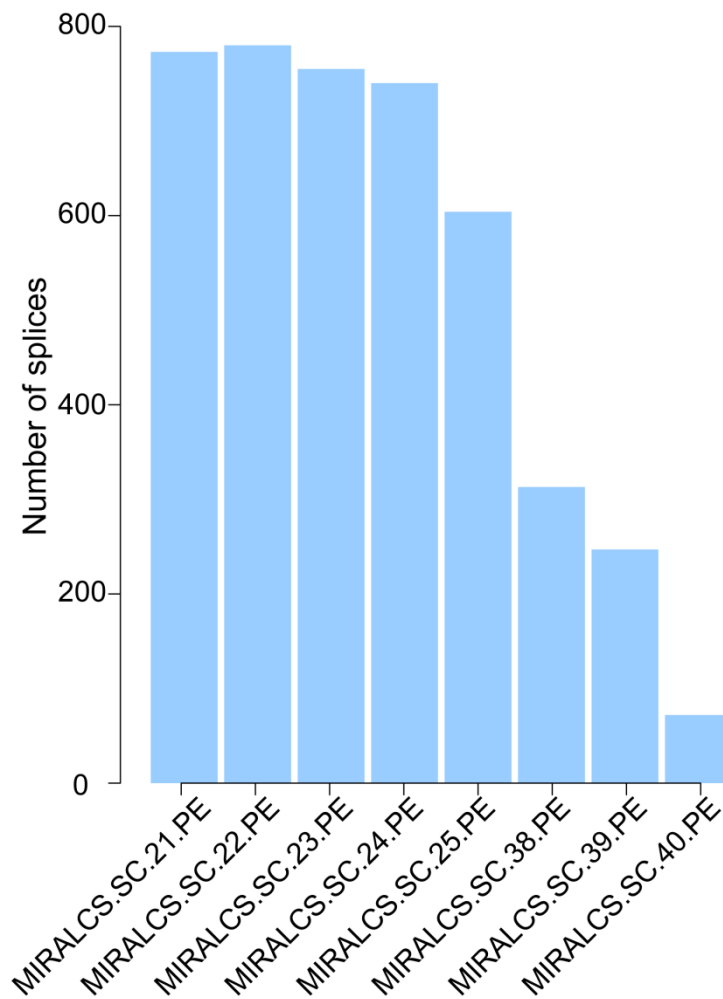

**Supplementary Figure 20.** The number of detected novel splices in single cells.

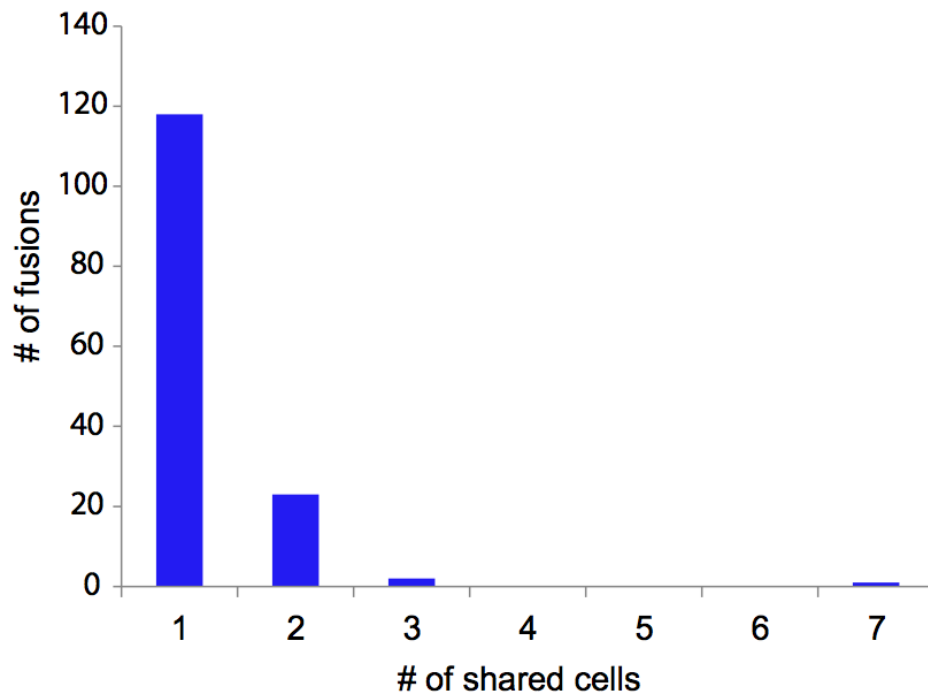

**Supplementary Figure 21.** The frequency of detected gene fusions in single cells.

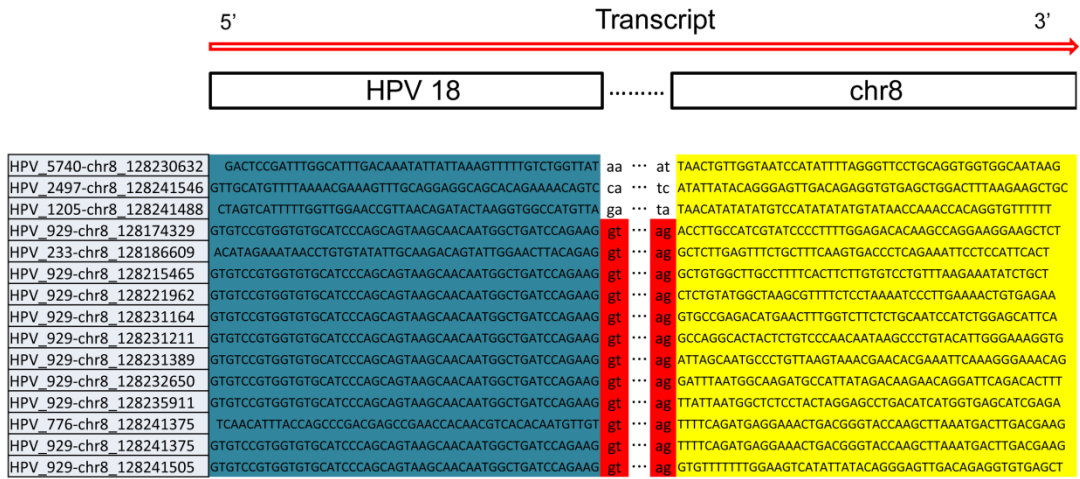

**Supplementary Figure 22.** Splicing donor-accepter signals detected at the HPV-18/cellular fusion breakpoints.



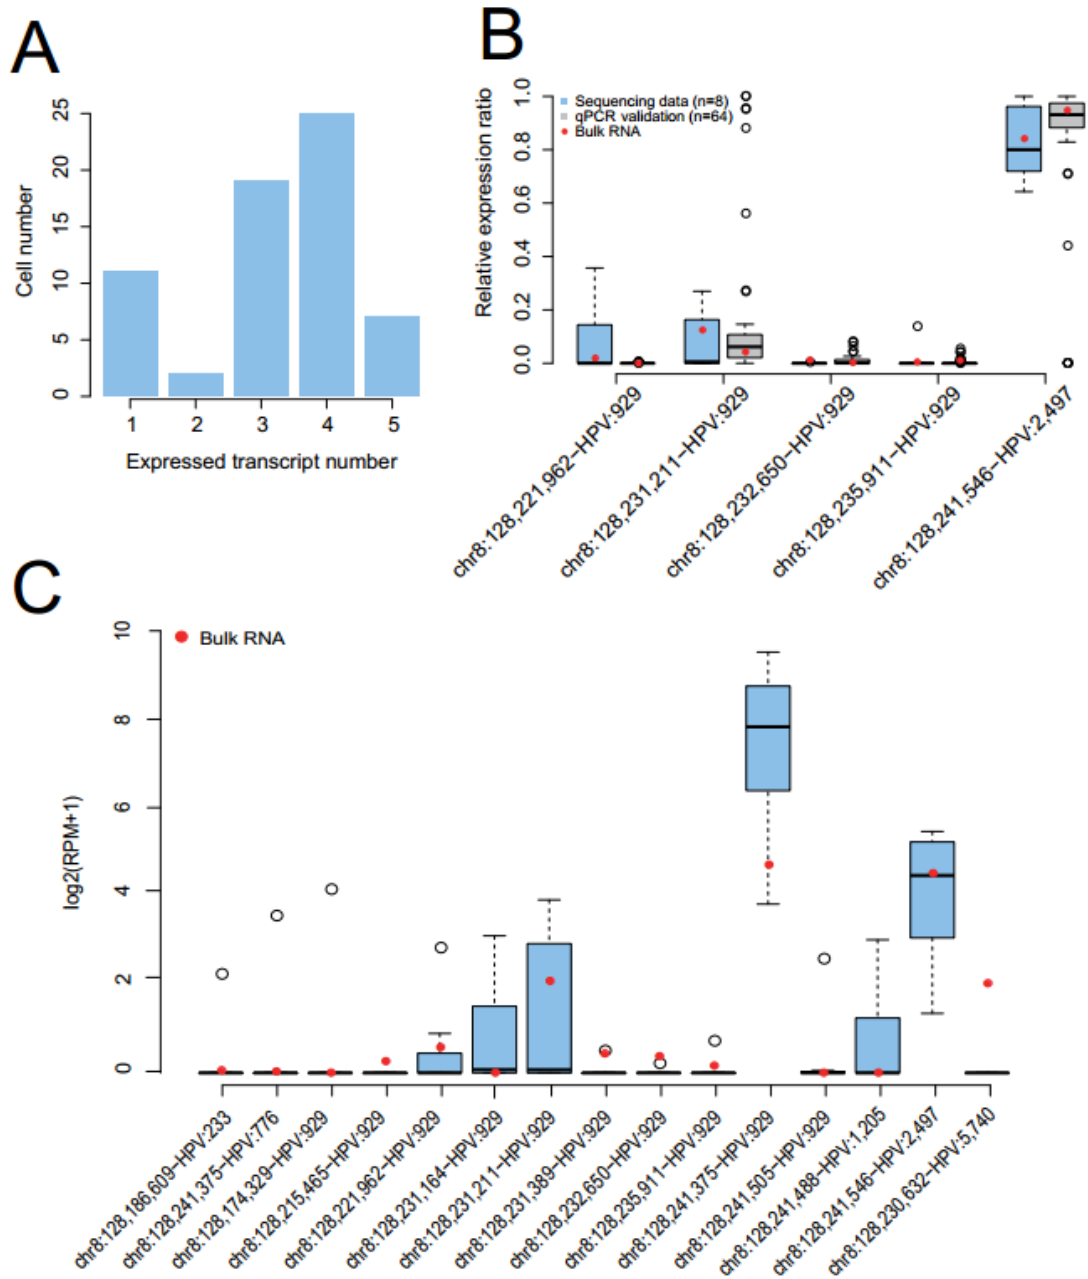

**Supplementary Figure 23.** Quantification of HPV/human fusions. (A) Distribution of the expressed transcript number of 5 fusions validated in 64 single cells by qPCR. (B) The relative expression ratio of 5 fusions quantified by RNA sequencing data and qPCR validation respectively. (C) The expression abundance of 15 fusions quantified by RNA sequencing data in 8 single cells and bulk RNA. RPM stands for reads per million.

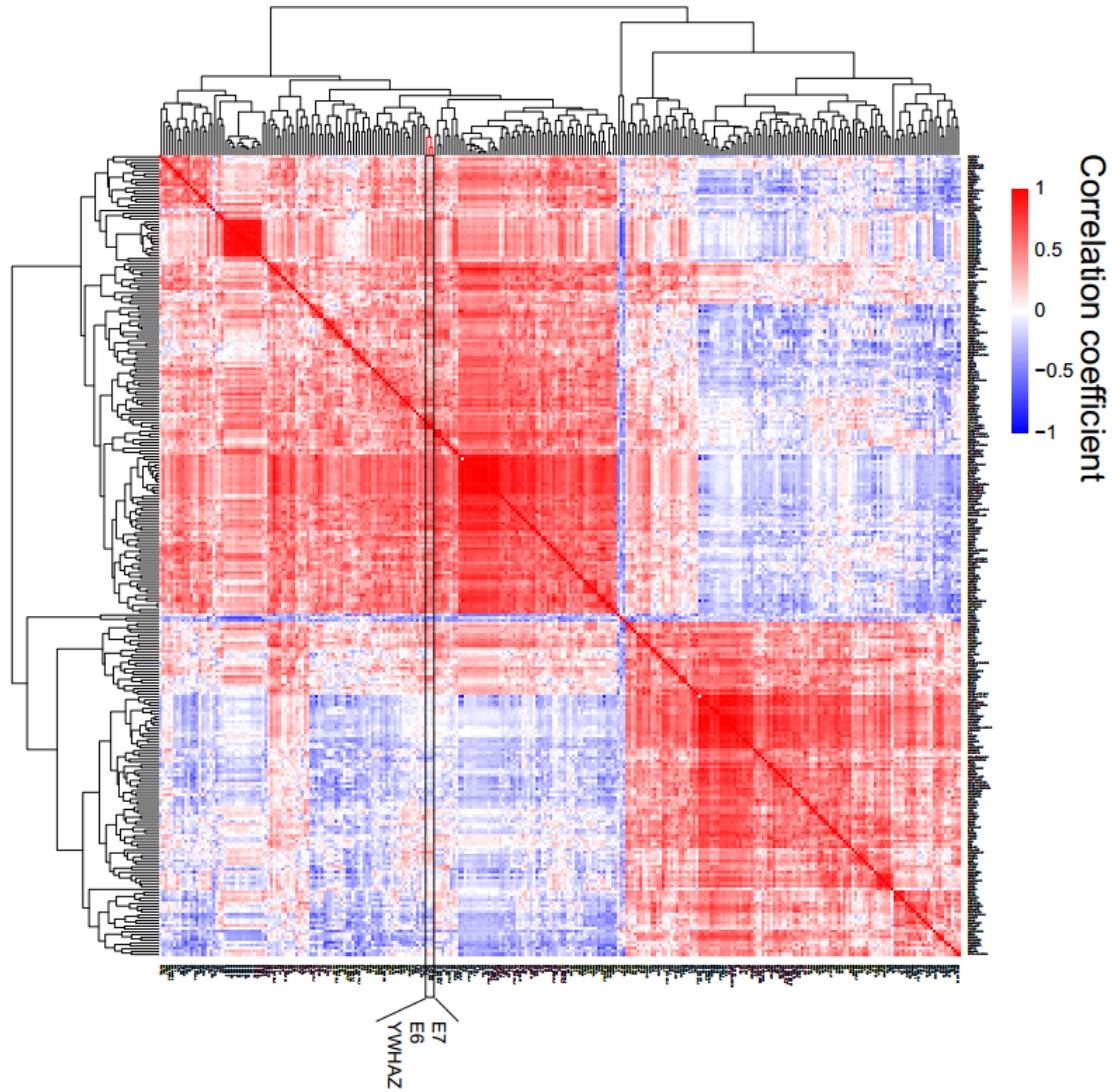

**Supplementary Figure 24.** Clustering of correlation coefficients of genes in the module which contains *E6* and *E7*.

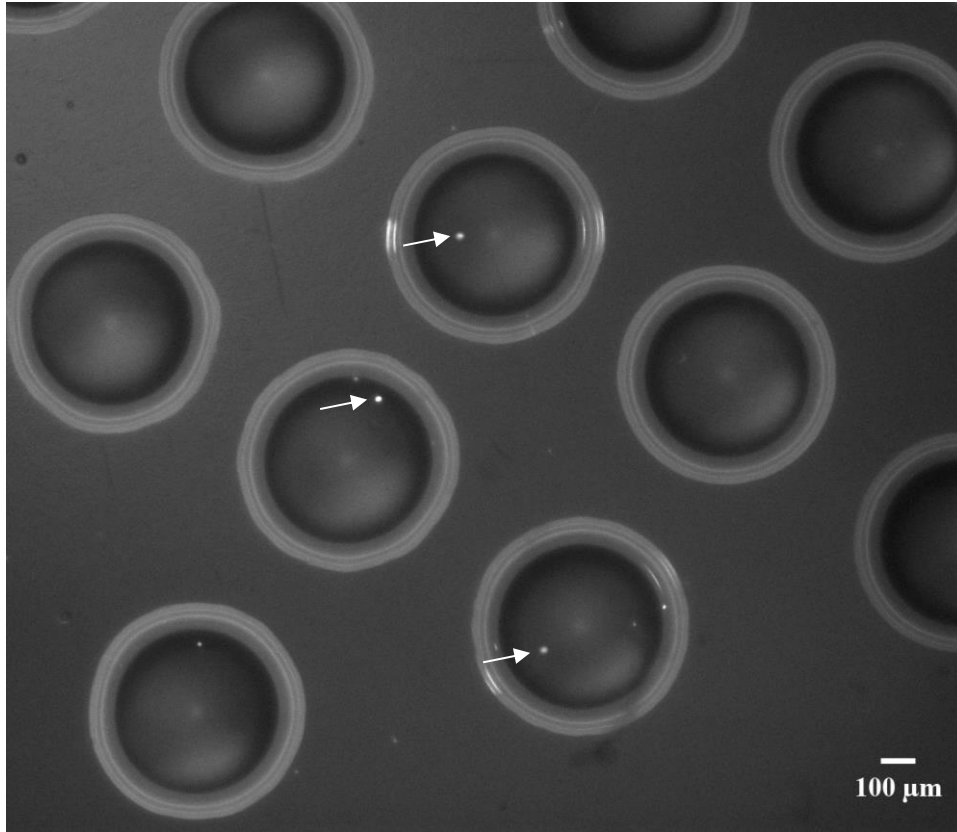

**Supplementary Figure 25.** Cells dispensed on a plastic film under the microscope. Cell dyed with SYBR green, dispensed on the transparent plastic film and the fluorescence image under the microscope was captured by CCD. The white arrows indicate single cells. Scale bar stand for 100  $\mu\text{m}$ .

**Supplementary Table 1.** Information of the sample-preparation platform and object (single cell or total RNA) of each library used.

| Platform    | Object          | Sample IDs       | Object        | Sample IDs    |
|-------------|-----------------|------------------|---------------|---------------|
| MIRALCS     | 10 pg total RNA | MIRALCS.10pg.1   | Single cell   | MIRALCS.SC.13 |
|             | 10 pg total RNA | MIRALCS.10pg.2   | Single cell   | MIRALCS.SC.14 |
|             | 10 pg total RNA | MIRALCS.10pg.3   | Single cell   | MIRALCS.SC.15 |
|             | 10 pg total RNA | MIRALCS.10pg.4   | Single cell   | MIRALCS.SC.16 |
|             | 10 pg total RNA | MIRALCS.10pg.5   | Single cell   | MIRALCS.SC.17 |
|             | Single cell     | MIRALCS.SC.21.PE | Single cell   | MIRALCS.SC.18 |
|             | Single cell     | MIRALCS.SC.22.PE | Single cell   | MIRALCS.SC.19 |
|             | Single cell     | MIRALCS.SC.23.PE | Single cell   | MIRALCS.SC.20 |
|             | Single cell     | MIRALCS.SC.24.PE | Single cell   | MIRALCS.SC.21 |
|             | Single cell     | MIRALCS.SC.25.PE | Single cell   | MIRALCS.SC.22 |
|             | Single cell     | MIRALCS.SC.38.PE | Single cell   | MIRALCS.SC.23 |
|             | Single cell     | MIRALCS.SC.39.PE | Single cell   | MIRALCS.SC.24 |
|             | Single cell     | MIRALCS.SC.40.PE | Single cell   | MIRALCS.SC.25 |
|             | Single cell     | MIRALCS.SC.1     | Single cell   | MIRALCS.SC.26 |
|             | Single cell     | MIRALCS.SC.2     | Single cell   | MIRALCS.SC.27 |
|             | Single cell     | MIRALCS.SC.3     | Single cell   | MIRALCS.SC.28 |
|             | Single cell     | MIRALCS.SC.4     | Single cell   | MIRALCS.SC.29 |
|             | Single cell     | MIRALCS.SC.5     | Single cell   | MIRALCS.SC.30 |
|             | Single cell     | MIRALCS.SC.6     | Single cell   | MIRALCS.SC.31 |
|             | Single cell     | MIRALCS.SC.7     | Single cell   | MIRALCS.SC.32 |
|             | Single cell     | MIRALCS.SC.8     | Single cell   | MIRALCS.SC.33 |
|             | Single cell     | MIRALCS.SC.9     | Single cell   | MIRALCS.SC.34 |
| Single cell | MIRALCS.SC.10   | Single cell      | MIRALCS.SC.35 |               |
| Single cell | MIRALCS.SC.11   | Single cell      | MIRALCS.SC.36 |               |
| Single cell | MIRALCS.SC.12   | Single cell      | MIRALCS.SC.37 |               |
| Tube-based  | 10 pg total RNA | InTube.10pg.1    | Single cell   | InTube.SC.1   |
|             | 10 pg total RNA | InTube.10pg.2    | Single cell   | InTube.SC.2   |
|             | 10 pg total RNA | InTube.10pg.3    | Single cell   | InTube.SC.3   |
|             | 5 ng total RNA  | InTube.5ng       | Single cell   | InTube.SC.4   |
|             | 5 ng total RNA  | InTube.5ng.PE    | Single cell   | InTube.SC.5   |

**Supplementary Table 2.** Information of RNA-seq data.

| Sample IDs     | Sample accession code | Total number of reads | Number of clean reads (%) | Number of uniquely mapped reads (%) | Read length |
|----------------|-----------------------|-----------------------|---------------------------|-------------------------------------|-------------|
| MIRALCS.10pg.1 | SRS1046095            | 2,650,640             | 2,621,015 (98.9)          | 1,410,668 (53.8)                    | 49          |
| MIRALCS.10pg.2 | SRS1046096            | 2,188,829             | 2,173,129 (99.3)          | 354,738 (16.3)                      | 49          |
| MIRALCS.10pg.3 | SRS1046097            | 3,376,802             | 3,351,539 (99.3)          | 1,496,316 (44.6)                    | 49          |
| MIRALCS.10pg.4 | SRS1046098            | 4,432,187             | 4,378,296 (98.8)          | 1,444,047 (33.0)                    | 49          |
| MIRALCS.10pg.5 | SRS1046099            | 13,688,431            | 13,626,494 (99.6)         | 8,513,991 (62.5)                    | 49          |
| MIRALCS.SC.1   | SRS1046058            | 3,325,941             | 3,315,650 (99.7)          | 2,787,810 (84.1)                    | 49          |
| MIRALCS.SC.2   | SRS1046059            | 3,864,635             | 3,850,609 (99.6)          | 3,428,671 (89.0)                    | 49          |
| MIRALCS.SC.3   | SRS1046060            | 4,978,882             | 4,961,363 (99.7)          | 4,200,221 (84.7)                    | 49          |
| MIRALCS.SC.4   | SRS1046061            | 3,833,147             | 3,821,363 (99.7)          | 3,305,766 (86.5)                    | 49          |
| MIRALCS.SC.5   | SRS1046062            | 4,672,614             | 4,658,204 (99.7)          | 3,946,583 (84.7)                    | 49          |
| MIRALCS.SC.6   | SRS1046063            | 5,117,576             | 5,099,891 (99.7)          | 4,362,022 (85.5)                    | 49          |
| MIRALCS.SC.7   | SRS1046064            | 4,962,043             | 4,944,363 (99.6)          | 4,056,502 (82.0)                    | 49          |
| MIRALCS.SC.8   | SRS1046065            | 3,328,009             | 3,318,410 (99.7)          | 2,630,541 (79.3)                    | 49          |
| MIRALCS.SC.9   | SRS1046066            | 5,536,886             | 5,520,364 (99.7)          | 4,704,250 (85.2)                    | 49          |
| MIRALCS.SC.10  | SRS1046067            | 4,107,819             | 4,094,990 (99.7)          | 3,281,604 (80.1)                    | 49          |
| MIRALCS.SC.11  | SRS1046068            | 4,102,994             | 4,090,618 (99.7)          | 3,427,168 (83.8)                    | 49          |
| MIRALCS.SC.12  | SRS1046069            | 3,544,197             | 3,532,007 (99.7)          | 3,020,131 (85.5)                    | 49          |
| MIRALCS.SC.13  | SRS1046070            | 3,068,546             | 3,059,002 (99.7)          | 2,409,121 (78.8)                    | 49          |
| MIRALCS.SC.14  | SRS1046071            | 2,451,949             | 2,445,135 (99.7)          | 1,908,993 (78.1)                    | 49          |
| MIRALCS.SC.15  | SRS1046072            | 3,372,426             | 3,362,307                 | 2,827,347                           | 49          |

|               |            |            |                      |                      |    |
|---------------|------------|------------|----------------------|----------------------|----|
|               |            |            | (99.7)               | (84.1)               |    |
| MIRALCS.SC.16 | SRS1046073 | 4,881,706  | 4,867,263<br>(99.7)  | 4,076,249<br>(83.7)  | 49 |
| MIRALCS.SC.17 | SRS1046074 | 4,194,228  | 4,181,705<br>(99.7)  | 3,474,449<br>(83.1)  | 49 |
| MIRALCS.SC.18 | SRS1046075 | 3,698,819  | 3,687,042<br>(99.7)  | 3,162,452<br>(85.8)  | 49 |
| MIRALCS.SC.19 | SRS1046076 | 3,327,986  | 3,317,840<br>(99.7)  | 2,769,786<br>(83.5)  | 49 |
| MIRALCS.SC.20 | SRS1046077 | 4,501,973  | 4,488,780<br>(99.7)  | 3,791,819<br>(84.5)  | 49 |
| MIRALCS.SC.21 | SRS1046078 | 10,820,458 | 10,765,254<br>(99.5) | 9,848,586<br>(91.5)  | 49 |
| MIRALCS.SC.22 | SRS1046079 | 10,233,497 | 10,181,503<br>(99.5) | 9,148,798<br>(89.9)  | 49 |
| MIRALCS.SC.23 | SRS1046080 | 9,489,263  | 9,440,890<br>(99.5)  | 8,499,422<br>(90.0)  | 49 |
| MIRALCS.SC.24 | SRS1046081 | 11,508,957 | 11,451,402<br>(99.5) | 10,191,371<br>(89.0) | 49 |
| MIRALCS.SC.25 | SRS1046082 | 12,869,177 | 12,805,357<br>(99.5) | 11,821,127<br>(92.3) | 49 |
| MIRALCS.SC.26 | SRS1046083 | 6,343,276  | 6,319,505<br>(99.6)  | 5,041,877<br>(79.8)  | 49 |
| MIRALCS.SC.27 | SRS1046084 | 6,254,905  | 6,234,500<br>(99.7)  | 4,931,008<br>(79.1)  | 49 |
| MIRALCS.SC.28 | SRS1046085 | 5,473,904  | 5,456,656<br>(99.7)  | 4,345,521<br>(79.6)  | 49 |
| MIRALCS.SC.29 | SRS1046086 | 9,143,205  | 9,119,102<br>(99.7)  | 7,308,470<br>(80.1)  | 49 |
| MIRALCS.SC.30 | SRS1046087 | 4,678,366  | 4,667,840<br>(99.8)  | 3,525,386<br>(75.5)  | 49 |
| MIRALCS.SC.31 | SRS1046088 | 6,052,736  | 6,038,357<br>(99.8)  | 2,102,961<br>(34.8)  | 49 |
| MIRALCS.SC.32 | SRS1046089 | 8,507,765  | 8,487,988<br>(99.8)  | 6,711,169<br>(79.1)  | 49 |
| MIRALCS.SC.33 | SRS1046090 | 10,475,529 | 10,441,265<br>(99.7) | 7,915,223<br>(75.8)  | 49 |
| MIRALCS.SC.34 | SRS1046091 | 16,599,053 | 16,515,269<br>(99.5) | 11,246,915<br>(68.1) | 49 |
| MIRALCS.SC.35 | SRS1046092 | 12,065,946 | 11,999,102<br>(99.5) | 9,130,544<br>(76.1)  | 49 |
| MIRALCS.SC.36 | SRS1046093 | 14,499,983 | 14,390,902<br>(99.3) | 11,685,634<br>(81.2) | 49 |
| MIRALCS.SC.37 | SRS1046094 | 11,236,237 | 11,186,358           | 8,833,449            | 49 |

|                  |            |            |                      |                      |     |
|------------------|------------|------------|----------------------|----------------------|-----|
|                  |            |            | (99.6)               | (79.0)               |     |
| MIRALCS.SC.21.PE | SRS1046101 | 25,999,028 | 25,114,733<br>(96.6) | 21,692,166<br>(86.4) | 150 |
| MIRALCS.SC.22.PE | SRS1046102 | 26,242,289 | 25,152,679<br>(95.9) | 21,018,293<br>(83.6) | 150 |
| MIRALCS.SC.23.PE | SRS1046103 | 23,190,348 | 22,411,711<br>(96.6) | 18,819,969<br>(84.0) | 150 |
| MIRALCS.SC.24.PE | SRS1046104 | 28,145,215 | 25,729,561<br>(91.4) | 20,725,957<br>(80.6) | 150 |
| MIRALCS.SC.25.PE | SRS1046105 | 34,231,992 | 30,248,920<br>(88.4) | 25,140,263<br>(83.1) | 150 |
| MIRALCS.SC.38.PE | SRS1046106 | 25,394,834 | 24,386,456<br>(96.0) | 20,484,030<br>(84.0) | 150 |
| MIRALCS.SC.39.PE | SRS1046107 | 28,084,700 | 26,850,835<br>(95.6) | 18,848,217<br>(70.2) | 150 |
| MIRALCS.SC.40.PE | SRS1046108 | 23,129,962 | 22,206,277<br>(96.0) | 19,092,129<br>(86.0) | 150 |
| InTube.5ng       | SRS1046049 | 8,225,060  | 8,207,225<br>(99.8)  | 6,212,557<br>(75.7)  | 49  |
| InTube.10pg.1    | SRS1046055 | 8,973,138  | 8,964,541<br>(99.9)  | 6,149,736<br>(68.6)  | 49  |
| InTube.10pg.2    | SRS1046056 | 9,004,201  | 8,995,705<br>(99.9)  | 5,322,883<br>(59.2)  | 49  |
| InTube.10pg.3    | SRS1046057 | 13,284,347 | 13,272,330<br>(99.9) | 6,690,585<br>(50.4)  | 49  |
| InTube.SC.1      | SRS1046050 | 4,374,029  | 4,359,679<br>(99.7)  | 3,868,664<br>(88.7)  | 49  |
| InTube.SC.2      | SRS1046051 | 4,536,723  | 4,522,586<br>(99.7)  | 3,739,420<br>(82.7)  | 49  |
| InTube.SC.3      | SRS1046052 | 5,033,844  | 5,019,666<br>(99.7)  | 1,723,724<br>(34.3)  | 49  |
| InTube.SC.4      | SRS1046053 | 4,587,821  | 4,573,315<br>(99.7)  | 4,085,848<br>(89.3)  | 49  |
| InTube.SC.5      | SRS1046054 | 4,309,279  | 4,296,639<br>(99.7)  | 3,750,466<br>(87.3)  | 49  |
| InTube.5ng.PE    | SRS1046100 | 46,307,229 | 41,923,767<br>(90.5) | 29,673,490<br>(70.8) | 90  |

**Supplementary Table 3.** Cell settling rate in Percoll solution of different concentrations.

| Component            | Cell concentration<br>(cells/10 $\mu$ l) | Cell concentration<br>30min later<br>(cells/10 $\mu$ l) | Remaining |
|----------------------|------------------------------------------|---------------------------------------------------------|-----------|
| PBS                  | 145                                      | 10                                                      | 6.90%     |
| 10% Percoll solution | 105                                      | 35                                                      | 33%       |
| 20% Percoll solution | 85                                       | 36                                                      | 42.30%    |
| 20% Percoll solution | 38                                       | 34                                                      | 89.50%    |
| 20% Percoll solution | 26                                       | 24                                                      | 92.30%    |



**Supplementary Table 4.** The Ct and Tm values of samples used to validate the selection mechanism.

| Sample                    | Ct   | Tm       | 2100 result |
|---------------------------|------|----------|-------------|
| negative control          | 15.9 | 79.7     | negative    |
| negative control          | 16.3 | 79.9     | negative    |
| negative control          | 16.5 | 79.8     | negative    |
| negative control          | 16.8 | 79.8     | negative    |
| negative control          | 16.9 | 79.8     | negative    |
| predicted non-target well | 15.4 | 79.6     | negative    |
| predicted non-target well | 15.4 | 87.2     | negative    |
| predicted non-target well | 15.4 | 87.2     | negative    |
| predicted non-target well | 15.5 | 79.6     | negative    |
| predicted non-target well | 16.2 | 87.4     | negative    |
| predicted non-target well | 16.2 | 87.5     | negative    |
| predicted non-target well | 16.0 | 86.0     | negative    |
| predicted non-target well | 15.4 | 78.5     | negative    |
| predicted non-target well | 15.5 | 78.9     | negative    |
| predicted non-target well | 15.6 | 79.4     | negative    |
| predicted non-target well | 16.2 | 87.4     | negative    |
| predicted non-target well | 16.2 | 79.0     | negative    |
| predicted non-target well | 16.3 | 79.2     | negative    |
| predicted non-target well | 16.4 | 78.8     | negative    |
| predicted non-target well | 16.4 | 85.5     | negative    |
| predicted non-target well | 16.5 | 85.5     | negative    |
| predicted non-target well | 16.8 | 78.9     | negative    |
| predicted non-target well | 16.8 | 85.9265  | negative    |
| predicted non-target well | 16.9 | 79.12568 | negative    |
| predicted non-target well | 17.1 | 85.50832 | negative    |
| positive control          | 12.8 | 86.00924 | positive    |
| positive control          | 12.9 | 85.58861 | positive    |
| positive control          | 12.9 | 86.06567 | positive    |
| positive control          | 13.0 | 85.49609 | positive    |
| positive control          | 13.0 | 86.09607 | positive    |
| predicted target well     | 13.0 | 88.97237 | positive    |
| predicted target well     | 13.0 | 88.06715 | positive    |
| predicted target well     | 13.0 | 88.06403 | positive    |
| predicted target well     | 12.7 | 87.58961 | positive    |
| predicted target well     | 12.8 | 85.35646 | positive    |
| predicted target well     | 12.9 | 88.46877 | positive    |
| predicted target well     | 13.0 | 87.9     | positive    |
| predicted target well     | 12.9 | 88.4     | positive    |
| predicted target well     | 13.0 | 87.9     | positive    |
| predicted target well     | 13.2 | 86.7     | positive    |

|                       |      |      |          |
|-----------------------|------|------|----------|
| predicted target well | 13.1 | 88.6 | positive |
| predicted target well | 12.7 | 85.7 | positive |
| predicted target well | 12.4 | 88.2 | positive |
| predicted target well | 12.4 | 87.6 | positive |
| predicted target well | 12.9 | 88.8 | positive |
| predicted target well | 13.1 | 88.6 | positive |
| predicted target well | 12.9 | 88.2 | positive |
| predicted target well | 12.6 | 87.9 | positive |
| predicted target well | 13.1 | 87.4 | positive |
| predicted target well | 13.1 | 87.4 | positive |

---

**Supplementary Table 11** Reads support by HeLa S3 cell line genome sequencing

| Human chromosome and position | HPV integration site | Mate pair reads | Clipped reads |
|-------------------------------|----------------------|-----------------|---------------|
| chr8:128,232,632*             | HPV:5,739            | 7               | 0             |
| chr8:128,233,367              | HPV:3,088            | 3               | 0             |
| chr8:128,234,255              | HPV:7,883            | 12              | 6             |
| chr8:128,241,545              | HPV:2,496            | 1               | 13            |

\*This pair of breakpoint is shared by the other 3 pairs of breakpoints.

**Supplementary Table 13** The comparison between MIRALCS and Fluidigm C1 system.

|                       | MIRALCS                         | Fluidigm C1 system              |
|-----------------------|---------------------------------|---------------------------------|
| Throughput            | > 500 single cells              | 96 single cells                 |
| Full-length mRNA      | Yes                             | Yes                             |
| Reaction scale        | nL                              | nL                              |
| Time consumption      | ~6 hours                        | ~4 hours                        |
| Data type             | Hiseq 2000 Singled-end<br>50 bp | Hiseq 4000 Paired-end<br>151 bp |
| Mapped reads rate     | ~75% (N = 37)                   | ~60% (N = 220)                  |
| Detected gene number* | 7,654 (3,854~10,015)            | 5,619 (1,499~8,585)             |

\*To avoid the influence of sequencing depth, we only selected the single-cells with more than 1.5Mreads, and detected gene number only calculate the genes with FPKM > 1.

### Supplementary Note 1 Operation steps of MIRALCS.

All reagents adding of MIRALCS is finished by using MSND, and the amplified cDNA was prepared by MIRALCS following the steps below. Samples and 20  $\mu$ l of reagents, including lysis buffer, reverse transcription mix and PCR-mix, were pre-added into 36 wells of a 384-well plate, and then dispensed into the micro-well chip in order. The chip was centrifuged after each addition for 5 minutes under 2600 rcf. As a proof-of-concept experiment, 20% Percoll solution was used as negative control and HeLa S3 total RNA with the concentration of 1, 10, 40 and 160 pg/50 nl was used as positive control to assess the feasibility of the protocol. The reverse transcription was performed following the Smart-seq2 protocol with slight modifications. The flow chart and the reagent list are shown below.

**Stage 1** Lysis buffer loading. Lysis buffer is prepared as follow, then they are added into 36/384 well plate. ERCC RNA spike in was purchased from Ambion, Life Technologies.

**Supplementary Table 14.** The components of lysis buffer.

| Component                     | Volume in each well (nl) | Total volume ( $\mu$ l) |
|-------------------------------|--------------------------|-------------------------|
| 10% Triton X-100              | 0.5                      | 7.56                    |
| 40 U/ $\mu$ l RNase Inhibitor | 1.25                     | 18.9                    |
| 10 $\mu$ M Oligo-dT Primer    | 12.5                     | 189                     |
| 10 mM dNTP                    | 12.5                     | 189                     |
| Spike in (1 : 116250)         | 23.25                    | 351.54                  |
| Total                         | 50                       | 756                     |

**Stage 2** Sample loading and lysis. Cell suspended in 20% Percoll solution with a concentration of 2~8 cells/ $\mu$ l, negative control of 20% Percoll solution without cells and positive control of total RNA with concentration of ~10 pg/well are added into 36 wells of 384-well plate, and then dispensed into the micro-well chip. After sample loading, micro-well chip is incubated at 72  $^{\circ}$ C for 3 min and 4  $^{\circ}$ C for 5min for the cell lysis.

**Stage 3** Reverse transcription reaction. Reverse transcription reagents are prepared following the table below. The mixed reagents are added into 36 wells of 384-well, and then dispensed into the micro-well chip. After reverse transcription mix dispensing, the micro-well chip is incubated at 42  $^{\circ}$ C for 90 min, 2 cycles of 50  $^{\circ}$ C for 2 min and 42  $^{\circ}$ C for 2 min, and then incubated at 70  $^{\circ}$ C for 15 min, 12  $^{\circ}$ C for 5 min for the mRNA reverse transcription.

**Supplementary Table 15.** The components of reverse transcription reaction buffer.

| Component                 | Volume per well (nl) | Total volume ( $\mu$ l) |
|---------------------------|----------------------|-------------------------|
| 200 U/ $\mu$ l SSII       | 6                    | 90.72                   |
| 5 $\times$ SuperScript II | 16                   | 241.92                  |

| First-Strand Buffer      |     |        |
|--------------------------|-----|--------|
| 5 M Betaine              | 16  | 241.92 |
| 100 mM MgCl <sub>2</sub> | 7.2 | 108.86 |
| 100 mM DTT               | 2.  | 30.24  |
| 100 μM TSO               | 0.8 | 12.1   |
| 40 U/μl RNase inhibitor  | 2   | 30.24  |
| Total                    | 50  | 756    |

**Stage 4** The cDNA Amplification. The PCR buffer is prepared by following the table below, added into 36 wells of a 384-well plate, and then dispensed into the micro-well chip. After PCR buffer dispensing, the micro-well chip is incubated in Smart cycling thermal instrument at 98 °C for 3 min, 22 cycles of 98 °C for 15 s, 67 °C for 20 s and 72 °C for 6 min, and then 72 °C for 5min, 72 °C to 98 °C, 0.4 °C per step, 98 °C for 15 s, 67 °C for 20 s, 72 °C for 6 min, 15 °C for 5 min.

**Supplementary Table 16.** The components of cDNA amplification reaction buffer.

| Component                     | Volume per well (nl) | Total volume (μl) |
|-------------------------------|----------------------|-------------------|
| 2×KAPA HiFi HotStart ReadyMix | 41.67                | 630               |
| 10 μM IS PCR Primer           | 0.83                 | 12.6              |
| Nuclease-free water           | 5                    | 75.6              |
| SYBR Green I (20×)            | 2.5                  | 37.8              |
| Total                         | 50                   | 756               |

Based on the Ct and Tm values produced in stage 4, we selected the target-wells, and output their position on the chip. Then after inputting the table of position of target wells to the software of the automatic extractor, we transported the amplified cDNA products of single cells from chip to 96-well plate and stored at -20 °C.
